# Supplementary material for: Acid–base properties of sulfur-bridged calix[4]arenesElectronic supplementary information (ESI) available: raw data and determined experimental parameters for the potentio- and photo-metric titrations; A–, AD–, ADQ–diagrams of 3. See http://www.rsc.org/suppdata/p2/b2/b200228k/
Source: Royal Society of Chemistry journal article supplement (doi:10.1039/b200228k), 2002-05-09
Supplement: b200228k.pdf [file b200228k.pdf]

**SUPPLEMENTARY MATERIAL****Acid-Base Properties of Sulfur-Bridged Calix[4]arenes**

Hiroaki Matsumiya, Yukiko Terazono, Nobuhiko Iki,\* and Sotaro Miyano

*Department of Biomolecular Engineering, Graduate School of Engineering,  
Tohoku University, Aramaki-Aoba 07, Aoba-ku, Sendai 980-8579, Japan*

---

\*To whom correspondence should be addressed.

Tel./fax: +81-(0)22-217-7264; e-mail: iki@orgsynth.che.tohoku.ac.jp

## CONTENTS

|                                                                                              |           |
|----------------------------------------------------------------------------------------------|-----------|
| <b>1. Potentiometric titration for the evaluation of the acid dissociation constants</b>     | <b>4</b>  |
| <b>1.1 Calix[4]arenetetrasulfonate (3)</b>                                                   | <b>4</b>  |
| 1.1.1 Summary of the experimental parameters                                                 |           |
| 1.1.2 Calculation of the first acid dissociation constant                                    |           |
| 1.1.2.1 Summary of the calculation parameters                                                |           |
| 1.1.2.2 Results                                                                              |           |
| <b>1.2 Thiacalix[4]arenetetrasulfonate (4)</b>                                               | <b>7</b>  |
| 1.2.1 Summary of the experimental parameters                                                 |           |
| 1.2.2 Calculation of the first acid dissociation constant                                    |           |
| 1.2.2.1 Summary of the calculation parameters                                                |           |
| 1.2.2.2 Results                                                                              |           |
| 1.2.3. Calculation of the second acid dissociation constant                                  |           |
| 1.2.3.1 Summary of the calculation parameters                                                |           |
| 1.2.3.2 Results                                                                              |           |
| <b>1.3 Sulfonylcalix[4]arenetetrasulfonate (5)</b>                                           | <b>11</b> |
| 1.3.1 Summary of the experimental parameters                                                 |           |
| 1.3.2 Calculation of the third and fourth acid dissociation constant                         |           |
| 1.3.2.1 Summary of the calculation parameters                                                |           |
| 1.3.2.2 Results                                                                              |           |
| <b>2. Spectrophotometric titration for the evaluation of the acid dissociation constants</b> | <b>16</b> |
| <b>2.1 Calix[4]arenetetrasulfonate (3)</b>                                                   | <b>16</b> |
| 2.1.1 Summary of the experimental parameters                                                 |           |
| 2.1.2 Calculation of the first acid dissociation constant                                    |           |
| 2.1.2.1 Summary of the calculation parameters                                                |           |
| 2.1.2.2 Results                                                                              |           |
| 2.1.3 Estimation of the $A_{H2L}$ values                                                     |           |
| 2.1.3.1 Summary of the calculation parameters                                                |           |
| 2.1.3.2 Results                                                                              |           |
| 2.1.4 Calculation of the second acid dissociation constant                                   |           |
| 2.1.4.1 Summary of the calculation parameters                                                |           |
| 2.1.4.2 Results                                                                              |           |
| <b>2.2 Thiacalix[4]arenetetrasulfonate (4)</b>                                               | <b>22</b> |
| 2.2.1 Summary of the experimental parameters                                                 |           |
| 2.2.2 Calculation of the first acid dissociation constant                                    |           |
| 2.2.2.1 Summary of the calculation parameters                                                |           |

|         |                                                                                                              |    |
|---------|--------------------------------------------------------------------------------------------------------------|----|
| 2.2.2.2 | Results                                                                                                      |    |
| 2.2.3   | Estimation of the $A_{\text{H2L}}$ values                                                                    |    |
| 2.2.3.1 | Summary of the calculation parameters                                                                        |    |
| 2.2.3.2 | Results                                                                                                      |    |
| 2.2.4   | Calculation of the second acid dissociation constant                                                         |    |
| 2.2.4.1 | Summary of the calculation parameters                                                                        |    |
| 2.2.4.2 | Results                                                                                                      |    |
| 2.2.5   | Calculation of the third and fourth acid dissociation constant                                               |    |
| 2.2.5.1 | Summary of the calculation parameters                                                                        |    |
| 2.2.5.2 | Results                                                                                                      |    |
| 2.3     | <b>Sulfonylcalix[4]arenetetrasulfonate (5) in the absence of electrolyte</b>                                 | 34 |
| 2.3.1   | Summary of the experimental parameters                                                                       |    |
| 2.3.2   | Calculation of the third and fourth acid dissociation constant                                               |    |
| 2.3.2.1 | Summary of the calculation parameters                                                                        |    |
| 2.3.2.2 | Results                                                                                                      |    |
| 2.4     | <b>Sulfonylcalix[4]arenetetrasulfonate (5) at the ionic strength of <math>0.2 \text{ mol dm}^{-3}</math></b> | 36 |
| 2.4.1   | Summary of the experimental parameters                                                                       |    |
| 2.4.2   | Estimation of the $A_{\text{H3L}}$ values                                                                    |    |
| 2.4.2.1 | Summary of the calculation parameters                                                                        |    |
| 2.4.2.2 | Results                                                                                                      |    |
| 2.4.3   | Calculation of the second acid dissociation constant                                                         |    |
| 2.4.3.1 | Summary of the calculation parameters                                                                        |    |
| 2.4.3.2 | Results                                                                                                      |    |
| 2.4.4   | Calculation of the third and fourth acid dissociation constant                                               |    |
| 2.4.4.1 | Summary of the calculation parameters                                                                        |    |
| 2.4.4.2 | Results                                                                                                      |    |
| 3.      | <b>A-, AD-, and ADQ-diagram of calix[4]arenetetrasulfonate (3)</b>                                           | 44 |
| 3.1     | <b>A-diagram</b>                                                                                             | 44 |
| 3.2     | <b>AD-diagram</b>                                                                                            | 44 |
| 3.3     | <b>ADQ-diagram</b>                                                                                           | 44 |

## 1. Potentiometric titration for the evaluation of the acid dissociation constants

### 1.1 Calix[4]arenetetrasulfonate (3)

#### 1.1.1 Summary of the experimental parameters

|                                                   |                                  |
|---------------------------------------------------|----------------------------------|
| Temperature/K                                     | 298                              |
| p[H] range                                        | 2.85-12.08                       |
| Total number of datum points                      | 75                               |
| Solution conditions                               |                                  |
| Initial volume/dm <sup>3</sup>                    | 55.0                             |
| Amount of the compound/mmol                       | 0.2211                           |
| Ionic strength/mol dm <sup>-3</sup> , electrolyte | 0.2, NaCl                        |
| Titrant                                           | 0.1038 mol dm <sup>-3</sup> NaOH |

#### 1.1.2 Calculation of the first acid dissociation constant

##### 1.1.2.1 Summary of the calculation parameters

|                            |                                                                               |
|----------------------------|-------------------------------------------------------------------------------|
| Method                     | linear regression analysis of eqn. (6),<br>setting allowable error to be 0.1% |
| p[H] range for calculation | 2.85-3.88                                                                     |
| Number of datum points     | 21                                                                            |

##### 1.1.2.2 Results

|                            |                     |
|----------------------------|---------------------|
| $pK_{a1} \pm \text{error}$ | $3.09_9 \pm 0.00_3$ |
| correlation coefficient    | 0.99921             |

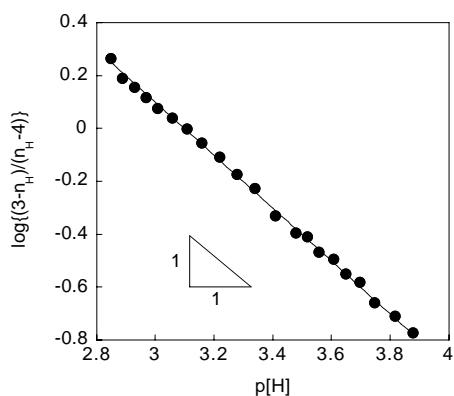

**Figure S-1. 1. 1** Evaluation of the  $pK_{a1}$  value for the calixarene **3**; plots of eqn. (6)

**Table S-1.1** Raw data

| p[H]  | V <sub>NaOH</sub> /ml | C <sub>calixarene</sub> /M | C <sub>NaOH</sub> /M | F       | $\bar{n}_H$ | $\log\{(3-\bar{n}_H)/(\bar{n}_H-4)\}$ |
|-------|-----------------------|----------------------------|----------------------|---------|-------------|---------------------------------------|
| 2.849 | 0.000                 | 0.004020                   | 0.000                | 0.000   | 3.648       | 0.2648                                |
| 2.889 | 0.1500                | 0.004009                   | 0.0002823            | 0.07042 | 3.608       | 0.1898                                |
| 2.929 | 0.2500                | 0.004002                   | 0.0004697            | 0.1174  | 3.588       | 0.1552                                |
| 2.969 | 0.3500                | 0.003994                   | 0.0006564            | 0.1643  | 3.567       | 0.1168                                |
| 3.009 | 0.4500                | 0.003987                   | 0.0008424            | 0.2113  | 3.543       | 0.07510                               |
| 3.059 | 0.5500                | 0.003980                   | 0.001028             | 0.2582  | 3.522       | 0.03909                               |
| 3.109 | 0.6500                | 0.003973                   | 0.001212             | 0.3052  | 3.499       | -0.001674                             |
| 3.159 | 0.7600                | 0.003965                   | 0.001415             | 0.3568  | 3.468       | -0.05507                              |
| 3.219 | 0.8700                | 0.003957                   | 0.001616             | 0.4085  | 3.439       | -0.1066                               |
| 3.279 | 0.9900                | 0.003949                   | 0.001835             | 0.4648  | 3.402       | -0.1724                               |
| 3.339 | 1.090                 | 0.003942                   | 0.002017             | 0.5117  | 3.372       | -0.2273                               |
| 3.409 | 1.240                 | 0.003931                   | 0.002289             | 0.5822  | 3.319       | -0.3300                               |
| 3.479 | 1.340                 | 0.003924                   | 0.002469             | 0.6291  | 3.286       | -0.3966                               |
| 3.519 | 1.370                 | 0.003922                   | 0.002523             | 0.6432  | 3.280       | -0.4109                               |
| 3.559 | 1.440                 | 0.003917                   | 0.002648             | 0.6761  | 3.253       | -0.4691                               |
| 3.609 | 1.480                 | 0.003915                   | 0.002720             | 0.6948  | 3.242       | -0.4951                               |
| 3.649 | 1.540                 | 0.003910                   | 0.002827             | 0.7230  | 3.220       | -0.5506                               |
| 3.699 | 1.580                 | 0.003908                   | 0.002899             | 0.7418  | 3.207       | -0.5832                               |
| 3.749 | 1.650                 | 0.003903                   | 0.003023             | 0.7746  | 3.180       | -0.6595                               |
| 3.819 | 1.700                 | 0.003899                   | 0.003112             | 0.7981  | 3.163       | -0.7106                               |
| 3.879 | 1.750                 | 0.003896                   | 0.003201             | 0.8216  | 3.144       | -0.7724                               |
| 3.959 | 1.790                 | 0.003893                   | 0.003272             | 0.8404  | 3.131       | -0.8202                               |
| 4.039 | 1.850                 | 0.003889                   | 0.003378             | 0.8685  | 3.108       | -0.9171                               |
| 4.149 | 1.900                 | 0.003886                   | 0.003466             | 0.8920  | 3.090       | -1.006                                |
| 4.279 | 1.950                 | 0.003882                   | 0.003554             | 0.9155  | 3.071       | -1.117                                |
| 4.449 | 2.030                 | 0.003877                   | 0.003695             | 0.9531  | 3.038       | -1.406                                |
| 4.739 | 2.060                 | 0.003875                   | 0.003747             | 0.9671  | 3.028       | -1.538                                |
| 5.459 | 2.100                 | 0.003872                   | 0.003818             | 0.9859  | 3.013       | -1.874                                |
| 9.089 | 2.170                 | 0.003867                   | 0.003940             | 1.019   | 2.987       | 3.400e+38                             |
| 9.669 | 2.250                 | 0.003862                   | 0.004079             | 1.056   | 2.965       | 3.400e+38                             |
| 9.949 | 2.300                 | 0.003859                   | 0.004166             | 1.080   | 2.961       | 3.400e+38                             |
| 10.11 | 2.350                 | 0.003855                   | 0.004253             | 1.103   | 2.956       | 3.400e+38                             |
| 10.23 | 2.400                 | 0.003852                   | 0.004340             | 1.127   | 2.951       | 3.400e+38                             |
| 10.32 | 2.450                 | 0.003848                   | 0.004427             | 1.150   | 2.946       | 3.400e+38                             |
| 10.40 | 2.490                 | 0.003846                   | 0.004496             | 1.169   | 2.947       | 3.400e+38                             |

**Table S-1.1** Raw data (continued)

|       |       |          |          |       |        |           |
|-------|-------|----------|----------|-------|--------|-----------|
| 10.46 | 2.550 | 0.003842 | 0.004599 | 1.197 | 2.936  | 3.400e+38 |
| 10.52 | 2.610 | 0.003838 | 0.004703 | 1.225 | 2.928  | 3.400e+38 |
| 10.57 | 2.660 | 0.003834 | 0.004789 | 1.249 | 2.923  | 3.400e+38 |
| 10.62 | 2.720 | 0.003830 | 0.004891 | 1.277 | 2.916  | 3.400e+38 |
| 10.66 | 2.760 | 0.003828 | 0.004960 | 1.296 | 2.916  | 3.400e+38 |
| 10.73 | 2.870 | 0.003821 | 0.005148 | 1.347 | 2.902  | 3.400e+38 |
| 10.79 | 2.990 | 0.003813 | 0.005352 | 1.404 | 2.883  | 3.400e+38 |
| 10.84 | 3.100 | 0.003805 | 0.005538 | 1.455 | 2.867  | 3.400e+38 |
| 10.89 | 3.210 | 0.003798 | 0.005724 | 1.507 | 2.856  | 3.400e+38 |
| 10.93 | 3.310 | 0.003792 | 0.005892 | 1.554 | 2.844  | 3.400e+38 |
| 10.97 | 3.440 | 0.003783 | 0.006110 | 1.615 | 2.823  | 3.400e+38 |
| 11.03 | 3.580 | 0.003774 | 0.006344 | 1.681 | 2.823  | 3.400e+38 |
| 11.07 | 3.750 | 0.003763 | 0.006626 | 1.761 | 2.793  | 3.400e+38 |
| 11.11 | 3.950 | 0.003751 | 0.006955 | 1.854 | 2.755  | 3.400e+38 |
| 11.16 | 4.150 | 0.003738 | 0.007283 | 1.948 | 2.738  | 3.400e+38 |
| 11.20 | 4.350 | 0.003725 | 0.007608 | 2.042 | 2.713  | 3.400e+38 |
| 11.25 | 4.700 | 0.003703 | 0.008172 | 2.207 | 2.645  | 3.400e+38 |
| 11.30 | 4.860 | 0.003694 | 0.008427 | 2.282 | 2.677  | 3.400e+38 |
| 11.35 | 5.200 | 0.003673 | 0.008966 | 2.441 | 2.640  | 3.400e+38 |
| 11.40 | 5.650 | 0.003645 | 0.009670 | 2.653 | 2.570  | 3.400e+38 |
| 11.45 | 6.050 | 0.003622 | 0.01029  | 2.840 | 2.541  | 3.400e+38 |
| 11.50 | 6.550 | 0.003592 | 0.01105  | 3.075 | 2.487  | 3.400e+38 |
| 11.54 | 6.950 | 0.003569 | 0.01165  | 3.263 | 2.461  | 3.400e+38 |
| 11.62 | 7.550 | 0.003535 | 0.01253  | 3.545 | 2.548  | 3.400e+38 |
| 11.67 | 8.400 | 0.003487 | 0.01375  | 3.944 | 2.436  | 3.400e+38 |
| 11.70 | 9.250 | 0.003441 | 0.01494  | 4.343 | 2.242  | 3.400e+38 |
| 11.73 | 10.55 | 0.003373 | 0.01671  | 4.953 | 1.872  | 3.400e+38 |
| 11.76 | 11.20 | 0.003340 | 0.01756  | 5.258 | 1.799  | 3.400e+38 |
| 11.79 | 12.05 | 0.003297 | 0.01865  | 5.657 | 1.661  | 3.400e+38 |
| 11.83 | 13.05 | 0.003249 | 0.01991  | 6.127 | 1.566  | 3.400e+38 |
| 11.86 | 14.10 | 0.003200 | 0.02118  | 6.620 | 1.398  | 3.400e+38 |
| 11.90 | 15.05 | 0.003156 | 0.02230  | 7.066 | 1.400  | 3.400e+38 |
| 11.92 | 16.05 | 0.003112 | 0.02345  | 7.535 | 1.208  | 3.400e+38 |
| 11.95 | 17.05 | 0.003069 | 0.02456  | 8.005 | 1.149  | 3.400e+38 |
| 11.98 | 18.03 | 0.003027 | 0.02563  | 8.465 | 1.133  | 3.400e+38 |
| 12.00 | 19.05 | 0.002986 | 0.02670  | 8.944 | 0.9996 | 3.400e+38 |

**Table S-1.1** Raw data (continued)

|       |       |          |         |       |        |           |
|-------|-------|----------|---------|-------|--------|-----------|
| 12.01 | 20.05 | 0.002946 | 0.02773 | 9.413 | 0.7507 | 3.400e+38 |
| 12.03 | 21.02 | 0.002908 | 0.02870 | 9.869 | 0.6692 | 3.400e+38 |
| 12.07 | 22.00 | 0.002871 | 0.02966 | 10.33 | 0.9323 | 3.400e+38 |
| 12.08 | 23.03 | 0.002833 | 0.03064 | 10.81 | 0.7172 | 3.400e+38 |

**1.2 Thiocalix[4]arenetetrasulfonate (4)****1.2.1** Summary of the experimental parameters

|                                                   |                                  |
|---------------------------------------------------|----------------------------------|
| Temperature/K                                     | 298                              |
| p[H] range                                        | 2.57-12.04                       |
| Total number of datum points                      | 98                               |
| Solution conditions                               |                                  |
| Initial volume/dm <sup>3</sup>                    | 55.0                             |
| Amount of the compound/mmol                       | 0.2045                           |
| Ionic strength/mol dm <sup>-3</sup> , electrolyte | 0.2, NaCl                        |
| Titrant                                           | 0.1038 mol dm <sup>-3</sup> NaOH |

**1.2.2** Calculation of the first acid dissociation constant**1.2.2.1** Summary of the calculation parameters

|                            |                                                                               |
|----------------------------|-------------------------------------------------------------------------------|
| Method                     | linear regression analysis of eqn. (6),<br>setting allowable error to be 0.1% |
| p[H] range for calculation | 2.57-3.27                                                                     |
| Number of datum points     | 9                                                                             |

**1.2.2.2** Results

|                            |                     |
|----------------------------|---------------------|
| $pK_{a1} \pm \text{error}$ | $2.17_1 \pm 0.00_7$ |
| correlation coefficient    | 0.99548             |

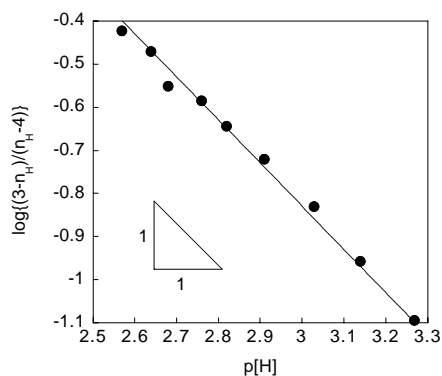**Figure S-1.2.1** Evaluation of the  $pK_{a1}$  value for the calixarene **4**; plots of eqn. (6)

### 1. 2. 3. Calculation of the second acid dissociation constant

#### 1. 2. 3. 1 Summary of the calculation parameters

|                            |                                                                               |
|----------------------------|-------------------------------------------------------------------------------|
| Method                     | linear regression analysis of eqn. (8),<br>setting allowable error to be 0.1% |
| p[H] range for calculation | 7.75-8.67                                                                     |
| Number of datum points     | 17                                                                            |

#### 1. 2. 3. 2 Results

|                            |                     |
|----------------------------|---------------------|
| $pK_{a2} \pm \text{error}$ | $8.41_3 \pm 0.00_2$ |
| correlation coefficient    | 0.99944             |

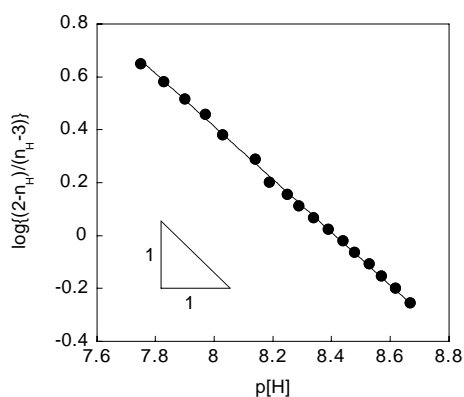

**Figure S-1. 2. 2** Evaluation of the  $pK_{a2}$  value for the calixarene **4**; plots of eqn. (8)

**Table S-1. 2** Raw data

| p[H]  | $V_{\text{NaOH}}/\text{ml}$ | $C_{\text{calixarene}}/\text{M}$ | $C_{\text{NaOH}}/\text{M}$ | $F$    | $\bar{n}_H$ | $\log\{(3-\bar{n}_H)/(\bar{n}_H-4)\}$ | $\log\{(2-\bar{n}_H)/(\bar{n}_H-3)\}$ |
|-------|-----------------------------|----------------------------------|----------------------------|--------|-------------|---------------------------------------|---------------------------------------|
| 2.569 | 0.000                       | 0.003718                         | 0.000                      | 0.000  | 3.275       | -0.4220                               | 3.400e+38                             |
| 2.639 | 0.2500                      | 0.003701                         | 0.0004697                  | 0.1269 | 3.253       | -0.4706                               | 3.400e+38                             |
| 2.679 | 0.4200                      | 0.003690                         | 0.0007866                  | 0.2132 | 3.219       | -0.5513                               | 3.400e+38                             |
| 2.759 | 0.6300                      | 0.003676                         | 0.001176                   | 0.3198 | 3.206       | -0.5848                               | 3.400e+38                             |
| 2.819 | 0.7900                      | 0.003665                         | 0.001470                   | 0.4010 | 3.185       | -0.6435                               | 3.400e+38                             |
| 2.909 | 0.9900                      | 0.003652                         | 0.001835                   | 0.5025 | 3.160       | -0.7205                               | 3.400e+38                             |
| 3.029 | 1.210                       | 0.003638                         | 0.002234                   | 0.6142 | 3.129       | -0.8306                               | 3.400e+38                             |
| 3.139 | 1.380                       | 0.003627                         | 0.002541                   | 0.7005 | 3.099       | -0.9575                               | 3.400e+38                             |
| 3.269 | 1.530                       | 0.003617                         | 0.002809                   | 0.7767 | 3.075       | -1.094                                | 3.400e+38                             |
| 3.399 | 1.630                       | 0.003611                         | 0.002988                   | 0.8274 | 3.062       | -1.179                                | 3.400e+38                             |
| 3.479 | 1.710                       | 0.003606                         | 0.003130                   | 0.8680 | 3.040       | -1.381                                | 3.400e+38                             |



**Table S-1.2** Raw data (continued)

|       |       |          |          |        |       |           |           |
|-------|-------|----------|----------|--------|-------|-----------|-----------|
| 3.679 | 1.810 | 0.003599 | 0.003307 | 0.9188 | 3.023 | -1.627    | 3.400e+38 |
| 3.829 | 1.850 | 0.003597 | 0.003378 | 0.9391 | 3.020 | -1.697    | 3.400e+38 |
| 4.049 | 1.910 | 0.003593 | 0.003484 | 0.9695 | 3.006 | -2.249    | 3.400e+38 |
| 4.539 | 1.940 | 0.003591 | 0.003537 | 0.9848 | 3.007 | -2.141    | 3.400e+38 |
| 6.249 | 2.010 | 0.003587 | 0.003660 | 1.020  | 2.980 | 3.400e+38 | 1.680     |
| 6.939 | 2.050 | 0.003584 | 0.003730 | 1.041  | 2.959 | 3.400e+38 | 1.373     |
| 7.219 | 2.120 | 0.003580 | 0.003853 | 1.076  | 2.924 | 3.400e+38 | 1.084     |
| 7.409 | 2.180 | 0.003576 | 0.003957 | 1.107  | 2.894 | 3.400e+38 | 0.9238    |
| 7.549 | 2.230 | 0.003573 | 0.004045 | 1.132  | 2.868 | 3.400e+38 | 0.8187    |
| 7.659 | 2.280 | 0.003570 | 0.004132 | 1.157  | 2.843 | 3.400e+38 | 0.7295    |
| 7.749 | 2.330 | 0.003567 | 0.004219 | 1.183  | 2.818 | 3.400e+38 | 0.6513    |
| 7.829 | 2.380 | 0.003564 | 0.004305 | 1.208  | 2.792 | 3.400e+38 | 0.5812    |
| 7.899 | 2.430 | 0.003561 | 0.004392 | 1.234  | 2.767 | 3.400e+38 | 0.5172    |
| 7.969 | 2.480 | 0.003558 | 0.004478 | 1.259  | 2.742 | 3.400e+38 | 0.4578    |
| 8.029 | 2.550 | 0.003553 | 0.004599 | 1.294  | 2.706 | 3.400e+38 | 0.3807    |
| 8.139 | 2.640 | 0.003548 | 0.004754 | 1.340  | 2.661 | 3.400e+38 | 0.2892    |
| 8.189 | 2.730 | 0.003542 | 0.004909 | 1.386  | 2.615 | 3.400e+38 | 0.2034    |
| 8.249 | 2.780 | 0.003539 | 0.004994 | 1.411  | 2.590 | 3.400e+38 | 0.1576    |
| 8.289 | 2.830 | 0.003536 | 0.005080 | 1.437  | 2.564 | 3.400e+38 | 0.1126    |
| 8.339 | 2.880 | 0.003533 | 0.005165 | 1.462  | 2.539 | 3.400e+38 | 0.06818   |
| 8.389 | 2.930 | 0.003530 | 0.005250 | 1.487  | 2.514 | 3.400e+38 | 0.02419   |
| 8.439 | 2.980 | 0.003527 | 0.005335 | 1.513  | 2.489 | 3.400e+38 | -0.01964  |
| 8.479 | 3.030 | 0.003524 | 0.005420 | 1.538  | 2.463 | 3.400e+38 | -0.06361  |
| 8.529 | 3.080 | 0.003521 | 0.005505 | 1.563  | 2.438 | 3.400e+38 | -0.1078   |
| 8.569 | 3.130 | 0.003518 | 0.005589 | 1.589  | 2.413 | 3.400e+38 | -0.1526   |
| 8.619 | 3.180 | 0.003515 | 0.005673 | 1.614  | 2.388 | 3.400e+38 | -0.1981   |
| 8.669 | 3.240 | 0.003511 | 0.005775 | 1.645  | 2.358 | 3.400e+38 | -0.2542   |
| 8.719 | 3.320 | 0.003506 | 0.005909 | 1.685  | 2.317 | 3.400e+38 | -0.3326   |
| 8.759 | 3.380 | 0.003503 | 0.006010 | 1.716  | 2.287 | 3.400e+38 | -0.3948   |
| 8.809 | 3.430 | 0.003500 | 0.006093 | 1.741  | 2.262 | 3.400e+38 | -0.4494   |
| 8.869 | 3.480 | 0.003497 | 0.006177 | 1.766  | 2.237 | 3.400e+38 | -0.5071   |
| 8.919 | 3.530 | 0.003494 | 0.006260 | 1.792  | 2.212 | 3.400e+38 | -0.5693   |
| 8.979 | 3.580 | 0.003491 | 0.006344 | 1.817  | 2.188 | 3.400e+38 | -0.6365   |
| 9.039 | 3.630 | 0.003488 | 0.006427 | 1.843  | 2.163 | 3.400e+38 | -0.7107   |
| 9.109 | 3.680 | 0.003485 | 0.006510 | 1.868  | 2.139 | 3.400e+38 | -0.7937   |
| 9.179 | 3.730 | 0.003482 | 0.006592 | 1.893  | 2.114 | 3.400e+38 | -0.8892   |

**Table S-1.2** Raw data (continued)

|       |       |          |          |       |       |           |           |
|-------|-------|----------|----------|-------|-------|-----------|-----------|
| 9.259 | 3.780 | 0.003479 | 0.006675 | 1.919 | 2.091 | 3.400e+38 | -1.002    |
| 9.339 | 3.830 | 0.003476 | 0.006758 | 1.944 | 2.067 | 3.400e+38 | -1.144    |
| 9.439 | 3.930 | 0.003470 | 0.006922 | 1.995 | 2.019 | 3.400e+38 | -1.709    |
| 9.539 | 3.980 | 0.003467 | 0.007004 | 2.020 | 1.997 | 3.400e+38 | 3.400e+38 |
| 9.659 | 4.030 | 0.003464 | 0.007086 | 2.046 | 1.978 | 3.400e+38 | 3.400e+38 |
| 9.769 | 4.070 | 0.003462 | 0.007152 | 2.066 | 1.964 | 3.400e+38 | 3.400e+38 |
| 9.889 | 4.130 | 0.003458 | 0.007250 | 2.096 | 1.943 | 3.400e+38 | 3.400e+38 |
| 10.01 | 4.180 | 0.003455 | 0.007332 | 2.122 | 1.931 | 3.400e+38 | 3.400e+38 |
| 10.12 | 4.230 | 0.003452 | 0.007413 | 2.147 | 1.921 | 3.400e+38 | 3.400e+38 |
| 10.21 | 4.280 | 0.003449 | 0.007494 | 2.173 | 1.911 | 3.400e+38 | 3.400e+38 |
| 10.29 | 4.330 | 0.003447 | 0.007575 | 2.198 | 1.902 | 3.400e+38 | 3.400e+38 |
| 10.36 | 4.390 | 0.003443 | 0.007673 | 2.228 | 1.890 | 3.400e+38 | 3.400e+38 |
| 10.42 | 4.430 | 0.003441 | 0.007737 | 2.249 | 1.887 | 3.400e+38 | 3.400e+38 |
| 10.47 | 4.530 | 0.003435 | 0.007899 | 2.299 | 1.853 | 3.400e+38 | 3.400e+38 |
| 10.53 | 4.580 | 0.003432 | 0.007979 | 2.325 | 1.850 | 3.400e+38 | 3.400e+38 |
| 10.57 | 4.630 | 0.003429 | 0.008060 | 2.350 | 1.842 | 3.400e+38 | 3.400e+38 |
| 10.62 | 4.680 | 0.003426 | 0.008140 | 2.376 | 1.840 | 3.400e+38 | 3.400e+38 |
| 10.66 | 4.730 | 0.003424 | 0.008220 | 2.401 | 1.836 | 3.400e+38 | 3.400e+38 |
| 10.69 | 4.780 | 0.003421 | 0.008300 | 2.426 | 1.828 | 3.400e+38 | 3.400e+38 |
| 10.75 | 4.880 | 0.003415 | 0.008459 | 2.477 | 1.815 | 3.400e+38 | 3.400e+38 |
| 10.81 | 4.980 | 0.003409 | 0.008618 | 2.528 | 1.808 | 3.400e+38 | 3.400e+38 |
| 10.86 | 5.110 | 0.003402 | 0.008824 | 2.594 | 1.784 | 3.400e+38 | 3.400e+38 |
| 10.90 | 5.230 | 0.003395 | 0.009013 | 2.655 | 1.760 | 3.400e+38 | 3.400e+38 |
| 10.96 | 5.380 | 0.003387 | 0.009249 | 2.731 | 1.747 | 3.400e+38 | 3.400e+38 |
| 11.02 | 5.540 | 0.003378 | 0.009499 | 2.812 | 1.738 | 3.400e+38 | 3.400e+38 |
| 11.06 | 5.730 | 0.003367 | 0.009794 | 2.909 | 1.696 | 3.400e+38 | 3.400e+38 |
| 11.12 | 5.930 | 0.003356 | 0.01010  | 3.010 | 1.687 | 3.400e+38 | 3.400e+38 |
| 11.17 | 6.130 | 0.003345 | 0.01041  | 3.112 | 1.673 | 3.400e+38 | 3.400e+38 |
| 11.21 | 6.340 | 0.003334 | 0.01073  | 3.218 | 1.645 | 3.400e+38 | 3.400e+38 |
| 11.26 | 6.630 | 0.003318 | 0.01117  | 3.365 | 1.608 | 3.400e+38 | 3.400e+38 |
| 11.30 | 6.900 | 0.003303 | 0.01157  | 3.503 | 1.569 | 3.400e+38 | 3.400e+38 |
| 11.36 | 7.330 | 0.003281 | 0.01221  | 3.721 | 1.518 | 3.400e+38 | 3.400e+38 |
| 11.41 | 7.780 | 0.003257 | 0.01286  | 3.949 | 1.451 | 3.400e+38 | 3.400e+38 |
| 11.47 | 8.310 | 0.003230 | 0.01362  | 4.218 | 1.403 | 3.400e+38 | 3.400e+38 |
| 11.52 | 8.830 | 0.003204 | 0.01436  | 4.482 | 1.352 | 3.400e+38 | 3.400e+38 |
| 11.56 | 9.310 | 0.003180 | 0.01503  | 4.726 | 1.300 | 3.400e+38 | 3.400e+38 |

**Table S-1.2** Raw data (continued)

|       |       |          |         |       |          |           |           |
|-------|-------|----------|---------|-------|----------|-----------|-----------|
| 11.59 | 9.830 | 0.003154 | 0.01574 | 4.990 | 1.199    | 3.400e+38 | 3.400e+38 |
| 11.63 | 10.33 | 0.003130 | 0.01641 | 5.244 | 1.175    | 3.400e+38 | 3.400e+38 |
| 11.69 | 11.38 | 0.003081 | 0.01780 | 5.777 | 1.045    | 3.400e+38 | 3.400e+38 |
| 11.74 | 12.33 | 0.003037 | 0.01901 | 6.259 | 0.9520   | 3.400e+38 | 3.400e+38 |
| 11.78 | 13.33 | 0.002993 | 0.02025 | 6.766 | 0.8064   | 3.400e+38 | 3.400e+38 |
| 11.82 | 14.33 | 0.002949 | 0.02145 | 7.274 | 0.7009   | 3.400e+38 | 3.400e+38 |
| 11.85 | 15.28 | 0.002910 | 0.02257 | 7.756 | 0.5613   | 3.400e+38 | 3.400e+38 |
| 11.88 | 16.33 | 0.002867 | 0.02376 | 8.289 | 0.4062   | 3.400e+38 | 3.400e+38 |
| 11.91 | 17.33 | 0.002827 | 0.02487 | 8.797 | 0.3050   | 3.400e+38 | 3.400e+38 |
| 11.94 | 18.33 | 0.002789 | 0.02595 | 9.305 | 0.2378   | 3.400e+38 | 3.400e+38 |
| 11.96 | 19.33 | 0.002751 | 0.02699 | 9.812 | 0.07054  | 3.400e+38 | 3.400e+38 |
| 11.98 | 20.33 | 0.002715 | 0.02801 | 10.32 | -0.07695 | 3.400e+38 | 3.400e+38 |
| 12.00 | 21.33 | 0.002679 | 0.02901 | 10.83 | -0.2036  | 3.400e+38 | 3.400e+38 |
| 12.02 | 22.33 | 0.002644 | 0.02997 | 11.34 | -0.3081  | 3.400e+38 | 3.400e+38 |
| 12.04 | 23.33 | 0.002611 | 0.03092 | 11.84 | -0.3894  | 3.400e+38 | 3.400e+38 |

**1.3 Sulfonylcalix[4]arenetetrasulfonate (5)****1.3.1** Summary of the experimental parameters

|                                                   |                                  |
|---------------------------------------------------|----------------------------------|
| Temperature/K                                     | 298                              |
| p[H] range                                        | 2.11-11.98                       |
| Total number of datum points                      | 95                               |
| Solution conditions                               |                                  |
| Initial volume/dm <sup>3</sup>                    | 55.0                             |
| Amount of the compound/mmol                       | 0.2560                           |
| Amount of HCl/mmol                                | 0.2501                           |
| Ionic strength/mol dm <sup>-3</sup> , electrolyte | 0.2, NaCl                        |
| Titrant                                           | 0.1038 mol dm <sup>-3</sup> NaOH |

**1.3.2** Calculation of the third and fourth acid dissociation constant**1.3.2.1** Summary of the calculation parameters

|                            |                                                                               |
|----------------------------|-------------------------------------------------------------------------------|
| Method                     | linear regression analysis of eqn. (9),<br>setting allowable error to be 0.1% |
| p[H] range for calculation | 3.90-5.41                                                                     |
| Number of datum points     | 26                                                                            |

### 1.3.2.2 Results

|                            |                     |
|----------------------------|---------------------|
| $pK_{a3} \pm \text{error}$ | $4.71_6 \pm 0.02_1$ |
| $pK_{a4} \pm \text{error}$ | $4.39_2 \pm 0.02_1$ |
| correlation coefficient    | 0.99966             |

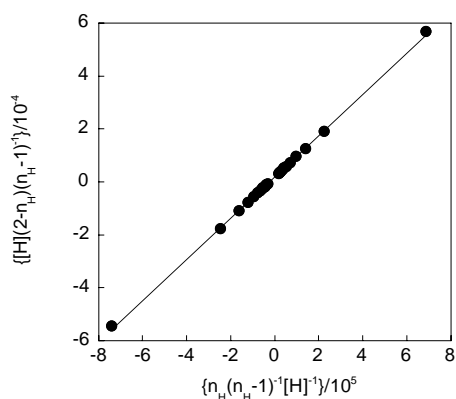

**Figure S-1.3.1** Evaluation of the  $pK_{a3}$  and  $pK_{a4}$  value for the calixarene **5**; plots of eqn. (9)

**Table S-1.3** Raw data

| p[H]  | $V_{\text{NaOH}}/\text{ml}$ | $C_L/\text{M}$ | $C_{\text{HCl}}/\text{M}$ | $C_{\text{NaOH}}/\text{M}$ | $F$    | $\bar{n}_H$ | $\bar{n}_H(\bar{n}_H-1)^{-1}[\text{H}]^{-1}$ | $(2-\bar{n}_H)[\text{H}](\bar{n}_H-1)^{-1}$ |
|-------|-----------------------------|----------------|---------------------------|----------------------------|--------|-------------|----------------------------------------------|---------------------------------------------|
| 2.109 | 0.000                       | 0.004655       | 0.004547                  | 0.000                      | 0.000  | 2.306       | 227.0                                        | -0.001822                                   |
| 2.139 | 0.3200                      | 0.004628       | 0.004521                  | 0.0006004                  | 0.1297 | 2.279       | 245.5                                        | -0.001582                                   |
| 2.169 | 0.6000                      | 0.004605       | 0.004498                  | 0.001120                   | 0.2432 | 2.262       | 264.5                                        | -0.001408                                   |
| 2.209 | 1.000                       | 0.004572       | 0.004466                  | 0.001854                   | 0.4054 | 2.220       | 294.5                                        | -0.001114                                   |
| 2.269 | 1.400                       | 0.004540       | 0.004434                  | 0.002577                   | 0.5676 | 2.224       | 337.7                                        | -0.0009840                                  |
| 2.319 | 1.750                       | 0.004512       | 0.004407                  | 0.003201                   | 0.7095 | 2.204       | 381.6                                        | -0.0008134                                  |
| 2.399 | 2.280                       | 0.004470       | 0.004366                  | 0.004132                   | 0.9243 | 2.160       | 466.7                                        | -0.0005502                                  |
| 2.459 | 2.580                       | 0.004447       | 0.004344                  | 0.004651                   | 1.046  | 2.149       | 538.2                                        | -0.0004517                                  |
| 2.519 | 2.850                       | 0.004426       | 0.004323                  | 0.005114                   | 1.155  | 2.138       | 620.9                                        | -0.0003661                                  |
| 2.599 | 3.200                       | 0.004399       | 0.004297                  | 0.005707                   | 1.297  | 2.107       | 756.0                                        | -0.0002440                                  |
| 2.659 | 3.420                       | 0.004383       | 0.004281                  | 0.006077                   | 1.386  | 2.090       | 874.5                                        | -0.0001812                                  |
| 2.729 | 3.610                       | 0.004369       | 0.004267                  | 0.006393                   | 1.464  | 2.086       | 1029                                         | -0.0001480                                  |
| 2.809 | 3.820                       | 0.004353       | 0.004252                  | 0.006741                   | 1.549  | 2.072       | 1246                                         | -0.0001037                                  |
| 2.909 | 4.050                       | 0.004336       | 0.004235                  | 0.007119                   | 1.642  | 2.051       | 1583                                         | -5.935e-05                                  |
| 2.989 | 4.200                       | 0.004325       | 0.004225                  | 0.007364                   | 1.703  | 2.037       | 1916                                         | -3.658e-05                                  |
| 3.059 | 4.300                       | 0.004318       | 0.004218                  | 0.007527                   | 1.743  | 2.031       | 2257                                         | -2.658e-05                                  |
| 3.139 | 4.400                       | 0.004310       | 0.004210                  | 0.007689                   | 1.784  | 2.025       | 2722                                         | -1.743e-05                                  |

**Table S-1.3** Raw data (continued)

|       |       |          |          |          |       |        |            |            |
|-------|-------|----------|----------|----------|-------|--------|------------|------------|
| 3.179 | 4.500 | 0.004303 | 0.004203 | 0.007850 | 1.824 | 1.999  | 3023       | 9.190e-07  |
| 3.229 | 4.550 | 0.004300 | 0.004200 | 0.007931 | 1.845 | 1.995  | 3398       | 2.989e-06  |
| 3.269 | 4.600 | 0.004296 | 0.004196 | 0.008011 | 1.865 | 1.987  | 3741       | 7.275e-06  |
| 3.329 | 4.650 | 0.004292 | 0.004193 | 0.008092 | 1.885 | 1.982  | 4305       | 8.366e-06  |
| 3.379 | 4.700 | 0.004289 | 0.004189 | 0.008172 | 1.905 | 1.974  | 4851       | 1.116e-05  |
| 3.489 | 4.800 | 0.004282 | 0.004182 | 0.008332 | 1.946 | 1.955  | 6312       | 1.524e-05  |
| 3.539 | 4.850 | 0.004278 | 0.004179 | 0.008412 | 1.966 | 1.943  | 7129       | 1.746e-05  |
| 3.649 | 4.950 | 0.004271 | 0.004172 | 0.008571 | 2.007 | 1.918  | 9315       | 2.017e-05  |
| 3.699 | 5.000 | 0.004267 | 0.004168 | 0.008650 | 2.027 | 1.903  | 1.054e+04  | 2.150e-05  |
| 3.749 | 5.050 | 0.004264 | 0.004165 | 0.008729 | 2.047 | 1.888  | 1.193e+04  | 2.254e-05  |
| 3.789 | 5.110 | 0.004260 | 0.004161 | 0.008824 | 2.072 | 1.867  | 1.325e+04  | 2.493e-05  |
| 3.829 | 5.150 | 0.004257 | 0.004158 | 0.008887 | 2.088 | 1.854  | 1.465e+04  | 2.531e-05  |
| 3.899 | 5.300 | 0.004246 | 0.004148 | 0.009123 | 2.149 | 1.798  | 1.785e+04  | 3.185e-05  |
| 3.969 | 5.400 | 0.004239 | 0.004141 | 0.009280 | 2.189 | 1.762  | 2.153e+04  | 3.349e-05  |
| 4.019 | 5.500 | 0.004232 | 0.004134 | 0.009436 | 2.230 | 1.724  | 2.487e+04  | 3.640e-05  |
| 4.069 | 5.610 | 0.004224 | 0.004126 | 0.009608 | 2.274 | 1.682  | 2.891e+04  | 3.972e-05  |
| 4.139 | 5.800 | 0.004211 | 0.004113 | 0.009902 | 2.351 | 1.608  | 3.642e+04  | 4.677e-05  |
| 4.189 | 5.950 | 0.004201 | 0.004103 | 0.01013  | 2.412 | 1.549  | 4.360e+04  | 5.310e-05  |
| 4.249 | 6.100 | 0.004191 | 0.004093 | 0.01036  | 2.473 | 1.490  | 5.393e+04  | 5.856e-05  |
| 4.309 | 6.320 | 0.004175 | 0.004079 | 0.01070  | 2.562 | 1.403  | 7.094e+04  | 7.274e-05  |
| 4.359 | 6.550 | 0.004160 | 0.004063 | 0.01105  | 2.655 | 1.311  | 9.639e+04  | 9.697e-05  |
| 4.419 | 6.750 | 0.004146 | 0.004050 | 0.01135  | 2.736 | 1.231  | 1.398e+05  | 0.0001267  |
| 4.469 | 6.950 | 0.004133 | 0.004037 | 0.01165  | 2.818 | 1.151  | 2.245e+05  | 0.0001909  |
| 4.519 | 7.200 | 0.004116 | 0.004021 | 0.01202  | 2.919 | 1.051  | 6.870e+05  | 0.0005687  |
| 4.589 | 7.450 | 0.004100 | 0.004005 | 0.01238  | 3.020 | 0.9502 | -7.415e+05 | -0.0005435 |
| 4.639 | 7.700 | 0.004084 | 0.003989 | 0.01275  | 3.122 | 0.8496 | -2.460e+05 | -0.0001756 |
| 4.689 | 7.900 | 0.004071 | 0.003976 | 0.01304  | 3.203 | 0.7691 | -1.628e+05 | -0.0001091 |
| 4.739 | 8.100 | 0.004058 | 0.003964 | 0.01332  | 3.284 | 0.6885 | -1.212e+05 | -7.678e-05 |
| 4.799 | 8.320 | 0.004044 | 0.003950 | 0.01364  | 3.373 | 0.5999 | -9.440e+04 | -5.558e-05 |
| 4.869 | 8.530 | 0.004030 | 0.003937 | 0.01394  | 3.458 | 0.5153 | -7.866e+04 | -4.141e-05 |
| 4.919 | 8.700 | 0.004019 | 0.003926 | 0.01418  | 3.527 | 0.4468 | -6.703e+04 | -3.383e-05 |
| 4.999 | 8.900 | 0.004007 | 0.003914 | 0.01446  | 3.608 | 0.3662 | -5.765e+04 | -2.583e-05 |
| 5.049 | 9.000 | 0.004001 | 0.003908 | 0.01460  | 3.649 | 0.3259 | -5.413e+04 | -2.218e-05 |
| 5.109 | 9.150 | 0.003991 | 0.003899 | 0.01481  | 3.709 | 0.2654 | -4.644e+04 | -1.837e-05 |
| 5.169 | 9.250 | 0.003985 | 0.003893 | 0.01494  | 3.750 | 0.2251 | -4.288e+04 | -1.552e-05 |
| 5.249 | 9.350 | 0.003979 | 0.003887 | 0.01508  | 3.791 | 0.1848 | -4.024e+04 | -1.255e-05 |

**Table S-1.3** Raw data (continued)

|       |       |          |          |         |       |            |            |            |
|-------|-------|----------|----------|---------|-------|------------|------------|------------|
| 5.349 | 9.450 | 0.003973 | 0.003881 | 0.01522 | 3.831 | 0.1446     | -3.776e+04 | -9.709e-06 |
| 5.409 | 9.550 | 0.003967 | 0.003875 | 0.01536 | 3.872 | 0.1042     | -2.983e+04 | -8.251e-06 |
| 5.489 | 9.600 | 0.003963 | 0.003872 | 0.01543 | 3.892 | 0.08409    | -2.831e+04 | -6.783e-06 |
| 5.589 | 9.650 | 0.003960 | 0.003869 | 0.01549 | 3.912 | 0.06399    | -2.654e+04 | -5.328e-06 |
| 5.719 | 9.700 | 0.003957 | 0.003866 | 0.01556 | 3.932 | 0.04389    | -2.404e+04 | -3.907e-06 |
| 5.909 | 9.750 | 0.003954 | 0.003863 | 0.01563 | 3.953 | 0.02379    | -1.977e+04 | -2.496e-06 |
| 6.289 | 9.800 | 0.003951 | 0.003860 | 0.01570 | 3.973 | 0.003706   | -7238      | -1.030e-06 |
| 8.319 | 9.830 | 0.003949 | 0.003858 | 0.01574 | 3.985 | -0.007397  | 1.531e+06  | -9.558e-09 |
| 9.579 | 9.900 | 0.003945 | 0.003854 | 0.01583 | 4.014 | -0.01961   | 7.297e+07  | -5.221e-10 |
| 9.919 | 9.950 | 0.003942 | 0.003851 | 0.01590 | 4.034 | -0.01954   | 1.591e+08  | -2.387e-10 |
| 10.12 | 10.00 | 0.003939 | 0.003848 | 0.01597 | 4.054 | -0.01787   | 2.309e+08  | -1.507e-10 |
| 10.25 | 10.05 | 0.003936 | 0.003845 | 0.01604 | 4.074 | -0.01735   | 3.027e+08  | -1.117e-10 |
| 10.36 | 10.11 | 0.003932 | 0.003841 | 0.01612 | 4.099 | -0.01847   | 4.146e+08  | -8.670e-11 |
| 10.44 | 10.15 | 0.003930 | 0.003839 | 0.01617 | 4.115 | -0.01370   | 3.715e+08  | -7.228e-11 |
| 10.51 | 10.20 | 0.003927 | 0.003836 | 0.01624 | 4.135 | -0.01211   | 3.864e+08  | -6.157e-11 |
| 10.58 | 10.30 | 0.003921 | 0.003830 | 0.01637 | 4.176 | -0.02681   | 9.907e+08  | -5.203e-11 |
| 10.62 | 10.32 | 0.003920 | 0.003829 | 0.01640 | 4.184 | -0.01826   | 7.461e+08  | -4.765e-11 |
| 10.68 | 10.40 | 0.003915 | 0.003824 | 0.01651 | 4.216 | -0.02247   | 1.050e+09  | -4.141e-11 |
| 10.72 | 10.45 | 0.003912 | 0.003821 | 0.01657 | 4.236 | -0.02163   | 1.109e+09  | -3.779e-11 |
| 10.79 | 10.55 | 0.003906 | 0.003815 | 0.01671 | 4.277 | -0.02011   | 1.213e+09  | -3.218e-11 |
| 10.89 | 10.71 | 0.003897 | 0.003806 | 0.01692 | 4.342 | -0.01158   | 8.868e+08  | -2.567e-11 |
| 10.96 | 10.90 | 0.003885 | 0.003795 | 0.01717 | 4.419 | -0.02558   | 2.270e+09  | -2.170e-11 |
| 11.04 | 11.10 | 0.003874 | 0.003784 | 0.01743 | 4.500 | -0.02089   | 2.239e+09  | -1.809e-11 |
| 11.11 | 11.30 | 0.003862 | 0.003772 | 0.01769 | 4.581 | -0.01233   | 1.566e+09  | -1.546e-11 |
| 11.19 | 11.60 | 0.003844 | 0.003755 | 0.01808 | 4.703 | -0.01100   | 1.682e+09  | -1.287e-11 |
| 11.26 | 11.90 | 0.003827 | 0.003738 | 0.01846 | 4.824 | -0.003807  | 6.886e+08  | -1.099e-11 |
| 11.34 | 12.30 | 0.003804 | 0.003716 | 0.01897 | 4.986 | 0.01075    | -2.372e+09 | -9.211e-12 |
| 11.40 | 12.70 | 0.003782 | 0.003694 | 0.01947 | 5.149 | 0.006730   | -1.698e+09 | -8.006e-12 |
| 11.46 | 13.20 | 0.003754 | 0.003667 | 0.02009 | 5.351 | -0.01137   | 3.235e+09  | -6.910e-12 |
| 11.52 | 13.70 | 0.003727 | 0.003640 | 0.02070 | 5.554 | -0.0006332 | 2.091e+08  | -6.051e-12 |
| 11.57 | 14.30 | 0.003695 | 0.003609 | 0.02142 | 5.797 | -0.03605   | 1.290e+10  | -5.301e-12 |
| 11.62 | 14.80 | 0.003668 | 0.003583 | 0.02201 | 6.000 | -0.006573  | 2.716e+09  | -4.792e-12 |
| 11.65 | 15.35 | 0.003640 | 0.003555 | 0.02265 | 6.223 | -0.06829   | 2.849e+10  | -4.344e-12 |
| 11.68 | 15.80 | 0.003616 | 0.003532 | 0.02316 | 6.405 | -0.08003   | 3.539e+10  | -4.032e-12 |
| 11.72 | 16.45 | 0.003583 | 0.003500 | 0.02390 | 6.669 | -0.09332   | 4.470e+10  | -3.656e-12 |
| 11.76 | 17.25 | 0.003544 | 0.003462 | 0.02478 | 6.993 | -0.1350    | 6.830e+10  | -3.276e-12 |

|       |       |          |          |         |       |         |           |            |
|-------|-------|----------|----------|---------|-------|---------|-----------|------------|
| 11.81 | 18.25 | 0.003495 | 0.003414 | 0.02586 | 7.399 | -0.1441 | 8.114e+10 | -2.909e-12 |
| 11.85 | 19.30 | 0.003446 | 0.003366 | 0.02696 | 7.824 | -0.2020 | 1.187e+11 | -2.593e-12 |
| 11.89 | 20.30 | 0.003400 | 0.003321 | 0.02798 | 8.230 | -0.2019 | 1.301e+11 | -2.365e-12 |
| 11.92 | 21.30 | 0.003356 | 0.003278 | 0.02898 | 8.635 | -0.2599 | 1.712e+11 | -2.161e-12 |
| 11.95 | 22.30 | 0.003312 | 0.003235 | 0.02994 | 9.041 | -0.2890 | 1.994e+11 | -1.997e-12 |
| 11.98 | 23.30 | 0.003270 | 0.003194 | 0.03089 | 9.446 | -0.2867 | 2.124e+11 | -1.865e-12 |

---

## 2. Spectrophotometric titration for the evaluation of the acid dissociation constants

### 2.1 Calix[4]arenetetrasulfonate (3)

#### 2.1.1 Summary of the experimental parameters

|                                                        |            |
|--------------------------------------------------------|------------|
| Temperature/K                                          | 298        |
| p[H] range                                             | 1.00-12.88 |
| Total number of datum points                           | 49         |
| Solution conditions                                    |            |
| Concentration of the compound/ $\mu\text{mol dm}^{-3}$ | 44.22      |
| Ionic strength/ $\text{mol dm}^{-3}$ , electrolyte     | 0.2, NaCl  |

#### 2.1.2 Calculation of the first acid dissociation constant

##### 2.1.2.1 Summary of the calculation parameters

|                            |                                                                                |           |           |
|----------------------------|--------------------------------------------------------------------------------|-----------|-----------|
| Method                     | linear regression analysis of eqn. (11),<br>setting allowable error to be 0.1% |           |           |
| Wavelength/nm              | 260                                                                            | 280       | 300       |
| p[H] range for calculation | 1.68-4.45                                                                      | 1.68-4.45 | 1.68-4.45 |
| Number of datum points     | 14                                                                             | 14        | 14        |
| Inputted $A_{\text{H4L}}$  | 0.09442                                                                        | 0.21911   | 0.00092   |
| Inputted $A_{\text{H3L}}$  | 0.32200                                                                        | 0.34500   | 0.15200   |

##### 2.1.2.2 Results

|                                          |                     |                     |                     |
|------------------------------------------|---------------------|---------------------|---------------------|
| Wavelength/nm                            | 260                 | 280                 | 300                 |
| $\text{p}K_{\text{a}1} \pm \text{error}$ | $3.08_7 \pm 0.00_6$ | $3.05_2 \pm 0.00_4$ | $3.07_8 \pm 0.00_5$ |
| Correlation coefficient                  | 0.99968             | 0.99981             | 0.99974             |

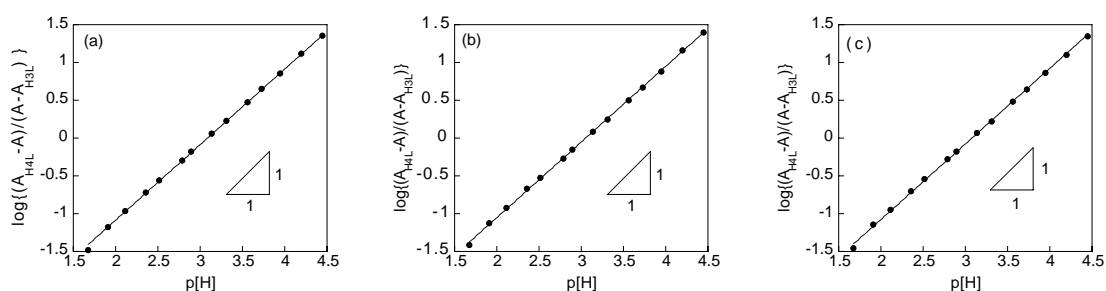

**Figure S-2.1.1** Evaluation of the  $\text{p}K_{\text{a}1}$  value for the calixarene **3**; plots of eqn. (11).

(a)  $\lambda = 260$  nm, (b)  $\lambda = 280$  nm, (c)  $\lambda = 300$  nm.



### 2. 1. 3 Estimation of the $A_{H2L}$ values

#### 2. 1. 3. 1 Summary of the calculation parameters

|                            |                                                                                |             |             |
|----------------------------|--------------------------------------------------------------------------------|-------------|-------------|
| Method                     | linear regression analysis of eqn. (27),<br>setting allowable error to be 0.1% |             |             |
| Wavelength/nm              | 260                                                                            | 280         | 300         |
| p[H] range for calculation | 10.90-12.88                                                                    | 11.32-12.88 | 11.32-12.88 |
| Number of datum points     | 11                                                                             | 9           | 9           |
| Inputted $A_{H3L}$         | 0.3220                                                                         | 0.3450      | 0.1520      |

#### 2. 1. 3. 2 Results

|                         |                         |                         |                         |
|-------------------------|-------------------------|-------------------------|-------------------------|
| wavelength/nm           | 260                     | 280                     | 300                     |
| $A_{H2L} \pm$ error     | $0.7916_7 \pm 0.0027_0$ | $0.5959_0 \pm 0.0016_4$ | $0.4396_1 \pm 0.0010_4$ |
| $pK_{a2} \pm$ error     | $12.01_0 \pm 0.00_4$    | $12.01_3 \pm 0.00_6$    | $12.01_9 \pm 0.00_3$    |
| Correlation coefficient | 0.99960                 | 0.99981                 | 0.99983                 |

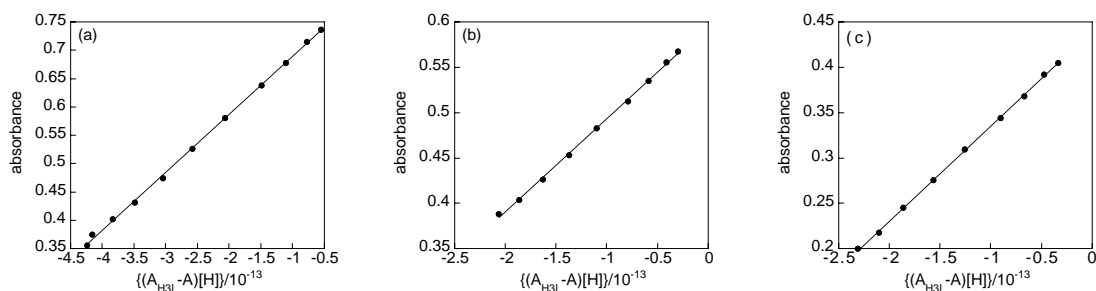

**Figure S-2. 1. 1** Estimation of the  $A_{H2L}$  values for the calixarene **3**; plots of eqn. (27).

(a)  $\lambda = 260$  nm, (b)  $\lambda = 280$  nm, (c)  $\lambda = 300$  nm.

### 2. 1. 4 Calculation of the second acid dissociation constant

#### 2. 1. 4. 1 Summary of the calculation parameters

|                            |                                                                                |             |             |
|----------------------------|--------------------------------------------------------------------------------|-------------|-------------|
| Method                     | linear regression analysis of eqn. (12),<br>setting allowable error to be 0.1% |             |             |
| Wavelength/nm              | 260                                                                            | 280         | 300         |
| p[H] range for calculation | 10.73-12.82                                                                    | 10.90-12.88 | 10.90-12.88 |
| Number of datum points     | 12                                                                             | 11          | 11          |
| Inputted $A_{H3L}$         | 0.32200                                                                        | 0.34500     | 0.15200     |
| Inputted $A_{H2L}$         | 0.79157                                                                        | 0.59590     | 0.43961     |

### 2. 1. 4. 2 Results

| Wavelength/nm              | 260                  | 280                  | 300                  |
|----------------------------|----------------------|----------------------|----------------------|
| $pK_{a2} \pm \text{error}$ | $12.00_5 \pm 0.00_4$ | $12.00_9 \pm 0.00_4$ | $12.01_9 \pm 0.00_2$ |
| Correlation coefficient    | 0.99984              | 0.99984              | 0.99992              |

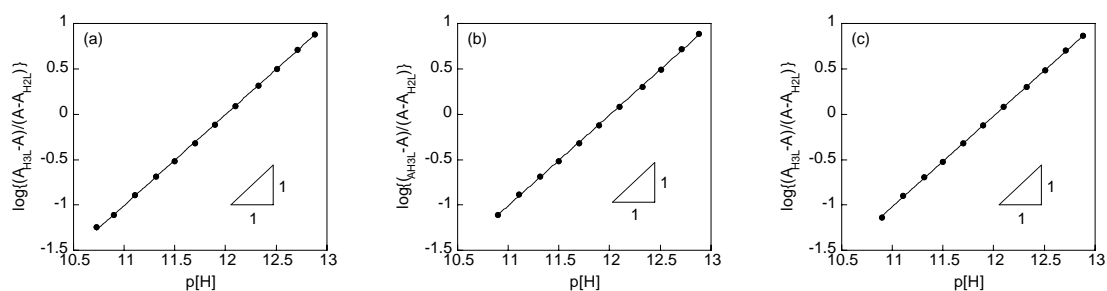

**Figure S-2. 1. 3** Evaluation of the  $pK_{a2}$  value for the calixarene **3**; plots of eqn. (12).

(a)  $\lambda = 260$  nm, (b)  $\lambda = 280$  nm, (c)  $\lambda = 300$  nm.

**Table S-2. 1** Raw data

(a) at 260 nm

| p[H]   | absorbance | $\log\{(A_{H_3L}-A)/(A-A_{H_3L})\}$ | $(A_{H_3L}-A)[H]$ | $\log\{(A_{H_3L}-A)/(A-A_{H_3L})\}$ |
|--------|------------|-------------------------------------|-------------------|-------------------------------------|
| 0.9991 | 0.094420   | -8.398                              | 0.02281           | 3.400e+38                           |
| 1.239  | 0.096010   | -2.153                              | 0.01303           | 3.400e+38                           |
| 1.449  | 0.098030   | -1.793                              | 0.007964          | 3.400e+38                           |
| 1.679  | 0.10166    | -1.483                              | 0.004613          | 3.400e+38                           |
| 1.909  | 0.10866    | -1.176                              | 0.002630          | 3.400e+38                           |
| 2.119  | 0.11676    | -0.9632                             | 0.001560          | 3.400e+38                           |
| 2.359  | 0.13079    | -0.7208                             | 0.0008364         | 3.400e+38                           |
| 2.519  | 0.14363    | -0.5593                             | 0.0005398         | 3.400e+38                           |
| 2.789  | 0.17128    | -0.2925                             | 0.0002450         | 3.400e+38                           |
| 2.899  | 0.18526    | -0.1776                             | 0.0001725         | 3.400e+38                           |
| 3.139  | 0.21606    | 0.06002                             | 7.691e-05         | 3.400e+38                           |
| 3.309  | 0.23785    | 0.2316                              | 4.130e-05         | 3.400e+38                           |
| 3.559  | 0.26536    | 0.4797                              | 1.563e-05         | 3.400e+38                           |
| 3.729  | 0.28071    | 0.6543                              | 7.705e-06         | 3.400e+38                           |
| 3.949  | 0.29443    | 0.8606                              | 3.100e-06         | 3.400e+38                           |
| 4.199  | 0.30589    | 1.118                               | 1.019e-06         | 3.400e+38                           |
| 4.449  | 0.31237    | 1.355                               | 3.424e-07         | 3.400e+38                           |
| 4.709  | 0.31640    | 1.598                               | 1.094e-07         | 3.400e+38                           |

**Table S-2. 1** Raw data (continued)

|       |         |           |            |           |
|-------|---------|-----------|------------|-----------|
| 5.099 | 0.31982 | 2.014     | 1.735e-08  | 3.400e+38 |
| 5.469 | 0.32069 | 2.237     | 4.448e-09  | 3.400e+38 |
| 5.919 | 0.32161 | 2.765     | 4.699e-10  | 3.400e+38 |
| 6.289 | 0.32201 | 3.400e+38 | -5.145e-12 | -4.671    |
| 6.699 | 0.32203 | 3.400e+38 | -6.000e-12 | -4.194    |
| 6.969 | 0.32196 | 3.755     | 4.295e-12  | 3.400e+38 |
| 7.199 | 0.32177 | 2.995     | 1.454e-11  | 3.400e+38 |
| 7.539 | 0.32181 | 3.078     | 5.491e-12  | 3.400e+38 |
| 7.839 | 0.32196 | 3.755     | 5.794e-13  | 3.400e+38 |
| 7.969 | 0.32352 | 3.400e+38 | -1.632e-11 | -2.488    |
| 8.259 | 0.32348 | 3.400e+38 | -8.151e-12 | -2.500    |
| 8.669 | 0.32367 | 3.400e+38 | -3.578e-12 | -2.447    |
| 8.909 | 0.32376 | 3.400e+38 | -2.170e-12 | -2.425    |
| 9.209 | 0.32465 | 3.400e+38 | -1.637e-12 | -2.246    |
| 9.499 | 0.32480 | 3.400e+38 | -8.873e-13 | -2.222    |
| 9.819 | 0.32714 | 3.400e+38 | -7.796e-13 | -1.956    |
| 10.10 | 0.33020 | 3.400e+38 | -6.527e-13 | -1.750    |
| 10.32 | 0.33389 | 3.400e+38 | -5.703e-13 | -1.585    |
| 10.50 | 0.33791 | 3.400e+38 | -5.042e-13 | -1.455    |
| 10.73 | 0.34738 | 3.400e+38 | -4.736e-13 | -1.243    |
| 10.90 | 0.35559 | 3.400e+38 | -4.238e-13 | -1.113    |
| 11.11 | 0.37542 | 3.400e+38 | -4.156e-13 | -0.8915   |
| 11.32 | 0.40188 | 3.400e+38 | -3.831e-13 | -0.6883   |
| 11.50 | 0.43190 | 3.400e+38 | -3.483e-13 | -0.5149   |
| 11.70 | 0.47423 | 3.400e+38 | -3.044e-13 | -0.3190   |
| 11.90 | 0.52597 | 3.400e+38 | -2.573e-13 | -0.1147   |
| 12.10 | 0.58108 | 3.400e+38 | -2.062e-13 | 0.09020   |
| 12.33 | 0.63846 | 3.400e+38 | -1.483e-13 | 0.3153    |
| 12.51 | 0.67848 | 3.400e+38 | -1.104e-13 | 0.4986    |
| 12.71 | 0.71568 | 3.400e+38 | -7.692e-14 | 0.7150    |
| 12.88 | 0.73705 | 3.400e+38 | -5.483e-14 | 0.8815    |

(b) at 280 nm

| p[H]   | absorbance | $\log\{(A_{H_{i,L}}-A)/(A-A_{H_{i,L}})\}$ | $(A_{H_{i,L}}-A)[H]$ | $\log\{(A_{H_{i,L}}-A)/(A-A_{H_{i,L}})\}$ |
|--------|------------|-------------------------------------------|----------------------|-------------------------------------------|
| 0.9991 | 0.21636    | 3.400e+38                                 | 0.01289              | 3.400e+38                                 |
| 1.239  | 0.21911    | 3.400e+38                                 | 0.007260             | 3.400e+38                                 |

**Table S-2. 1** Raw data (continued)

|       |         |           |            |           |
|-------|---------|-----------|------------|-----------|
| 1.449 | 0.22094 | -1.831    | 0.004411   | 3.400e+38 |
| 1.679 | 0.22375 | -1.417    | 0.002539   | 3.400e+38 |
| 1.909 | 0.22784 | -1.128    | 0.001444   | 3.400e+38 |
| 2.119 | 0.23261 | -0.9204   | 0.0008544  | 3.400e+38 |
| 2.359 | 0.24130 | -0.6696   | 0.0004536  | 3.400e+38 |
| 2.519 | 0.24797 | -0.5266   | 0.0002936  | 3.400e+38 |
| 2.789 | 0.26338 | -0.2657   | 0.0001327  | 3.400e+38 |
| 2.899 | 0.27104 | -0.1536   | 9.331e-05  | 3.400e+38 |
| 3.139 | 0.28813 | 0.08409   | 4.129e-05  | 3.400e+38 |
| 3.309 | 0.29953 | 0.2476    | 2.232e-05  | 3.400e+38 |
| 3.559 | 0.31491 | 0.5029    | 8.305e-06  | 3.400e+38 |
| 3.729 | 0.32290 | 0.6718    | 4.124e-06  | 3.400e+38 |
| 3.949 | 0.33043 | 0.8831    | 1.638e-06  | 3.400e+38 |
| 4.199 | 0.33696 | 1.166     | 5.084e-07  | 3.400e+38 |
| 4.449 | 0.34017 | 1.399     | 1.717e-07  | 3.400e+38 |
| 4.709 | 0.34258 | 1.708     | 4.729e-08  | 3.400e+38 |
| 5.099 | 0.34406 | 2.124     | 7.483e-09  | 3.400e+38 |
| 5.469 | 0.34478 | 2.757     | 7.470e-10  | 3.400e+38 |
| 5.919 | 0.34536 | 3.400e+38 | -4.337e-10 | -2.843    |
| 6.289 | 0.34512 | 3.400e+38 | -6.168e-11 | -3.320    |
| 6.699 | 0.34531 | 3.400e+38 | -6.199e-11 | -2.908    |
| 6.969 | 0.34511 | 3.400e+38 | -1.181e-11 | -3.358    |
| 7.199 | 0.34539 | 3.400e+38 | -2.466e-11 | -2.808    |
| 7.539 | 0.34497 | 3.623     | 8.674e-13  | 3.400e+38 |
| 7.839 | 0.34548 | 3.400e+38 | -6.953e-12 | -2.717    |
| 7.969 | 0.34786 | 3.400e+38 | -3.071e-11 | -1.938    |
| 8.259 | 0.34855 | 3.400e+38 | -1.955e-11 | -1.843    |
| 8.669 | 0.34848 | 3.400e+38 | -7.456e-12 | -1.852    |
| 8.909 | 0.34818 | 3.400e+38 | -3.921e-12 | -1.892    |
| 9.209 | 0.34819 | 3.400e+38 | -1.971e-12 | -1.890    |
| 9.499 | 0.34871 | 3.400e+38 | -1.176e-12 | -1.824    |
| 9.819 | 0.34952 | 3.400e+38 | -6.856e-13 | -1.736    |
| 10.10 | 0.35159 | 3.400e+38 | -5.246e-13 | -1.569    |
| 10.32 | 0.35317 | 3.400e+38 | -3.919e-13 | -1.473    |
| 10.50 | 0.35525 | 3.400e+38 | -3.248e-13 | -1.371    |
| 10.73 | 0.35961 | 3.400e+38 | -2.726e-13 | -1.209    |

**Table S-2. 1** Raw data (continued)

|       |         |           |            |         |
|-------|---------|-----------|------------|---------|
| 10.90 | 0.36302 | 3.400e+38 | -2.273e-13 | -1.111  |
| 11.11 | 0.37390 | 3.400e+38 | -2.248e-13 | -0.8855 |
| 11.32 | 0.38798 | 3.400e+38 | -2.062e-13 | -0.6846 |
| 11.50 | 0.40364 | 3.400e+38 | -1.858e-13 | -0.5157 |
| 11.70 | 0.42625 | 3.400e+38 | -1.625e-13 | -0.3197 |
| 11.90 | 0.45342 | 3.400e+38 | -1.368e-13 | -0.1186 |
| 12.10 | 0.48285 | 3.400e+38 | -1.097e-13 | 0.08614 |
| 12.33 | 0.51285 | 3.400e+38 | -7.868e-14 | 0.3056  |
| 12.51 | 0.53487 | 3.400e+38 | -5.880e-14 | 0.4929  |
| 12.71 | 0.55536 | 3.400e+38 | -4.110e-14 | 0.7151  |
| 12.88 | 0.56735 | 3.400e+38 | -2.937e-14 | 0.8914  |

(c) at 300 nm

| p[H]   | absorbance | $\log\{(A_{H_{3L}}-A)/(A-A_{H_{3L}})\}$ | $(A_{H_{3L}}-A)[H]$ | $\log\{(A_{H_{3L}}-A)/(A-A_{H_{3L}})\}$ |
|--------|------------|-----------------------------------------|---------------------|-----------------------------------------|
| 0.9991 | 0.00092000 | -9.869                                  | 0.01514             | 3.400e+38                               |
| 1.239  | 0.0019700  | -2.155                                  | 0.008652            | 3.400e+38                               |
| 1.449  | 0.0033500  | -1.787                                  | 0.005286            | 3.400e+38                               |
| 1.679  | 0.0060600  | -1.453                                  | 0.003056            | 3.400e+38                               |
| 1.909  | 0.011030   | -1.144                                  | 0.001738            | 3.400e+38                               |
| 2.119  | 0.016370   | -0.9434                                 | 0.001031            | 3.400e+38                               |
| 2.359  | 0.025950   | -0.7021                                 | 0.0005514           | 3.400e+38                               |
| 2.519  | 0.034530   | -0.5435                                 | 0.0003555           | 3.400e+38                               |
| 2.789  | 0.052850   | -0.2809                                 | 0.0001611           | 3.400e+38                               |
| 2.899  | 0.061610   | -0.1730                                 | 0.0001140           | 3.400e+38                               |
| 3.139  | 0.082300   | 0.06728                                 | 5.060e-05           | 3.400e+38                               |
| 3.309  | 0.095450   | 0.2231                                  | 2.776e-05           | 3.400e+38                               |
| 3.559  | 0.11457    | 0.4823                                  | 1.033e-05           | 3.400e+38                               |
| 3.729  | 0.12433    | 0.6493                                  | 5.163e-06           | 3.400e+38                               |
| 3.949  | 0.13406    | 0.8705                                  | 2.017e-06           | 3.400e+38                               |
| 4.199  | 0.14100    | 1.105                                   | 6.955e-07           | 3.400e+38                               |
| 4.449  | 0.14557    | 1.352                                   | 2.286e-07           | 3.400e+38                               |
| 4.709  | 0.14811    | 1.578                                   | 7.601e-08           | 3.400e+38                               |
| 5.099  | 0.15032    | 1.949                                   | 1.337e-08           | 3.400e+38                               |
| 5.469  | 0.15114    | 2.242                                   | 2.920e-09           | 3.400e+38                               |
| 5.919  | 0.15182    | 2.923                                   | 2.169e-10           | 3.400e+38                               |
| 6.289  | 0.15195    | 3.480                                   | 2.570e-11           | 3.400e+38                               |

**Table S-2.1** Raw data (continued)

|       |         |           |            |           |
|-------|---------|-----------|------------|-----------|
| 6.699 | 0.15218 | 3.400e+38 | -3.599e-11 | -3.203    |
| 6.969 | 0.15210 | 3.400e+38 | -1.074e-11 | -3.459    |
| 7.199 | 0.15209 | 3.400e+38 | -5.691e-12 | -3.504    |
| 7.539 | 0.15214 | 3.400e+38 | -4.046e-12 | -3.312    |
| 7.839 | 0.15197 | 3.702     | 4.346e-13  | 3.400e+38 |
| 7.969 | 0.15150 | 2.479     | 5.369e-12  | 3.400e+38 |
| 8.259 | 0.15232 | 3.400e+38 | -1.762e-12 | -2.953    |
| 8.669 | 0.15228 | 3.400e+38 | -5.999e-13 | -3.011    |
| 8.909 | 0.15211 | 3.400e+38 | -1.356e-13 | -3.417    |
| 9.209 | 0.15269 | 3.400e+38 | -4.264e-13 | -2.619    |
| 9.499 | 0.15284 | 3.400e+38 | -2.662e-13 | -2.533    |
| 9.819 | 0.15496 | 3.400e+38 | -4.490e-13 | -1.983    |
| 10.10 | 0.15695 | 3.400e+38 | -3.940e-13 | -1.757    |
| 10.32 | 0.15932 | 3.400e+38 | -3.511e-13 | -1.583    |
| 10.50 | 0.16129 | 3.400e+38 | -2.944e-13 | -1.477    |
| 10.73 | 0.16723 | 3.400e+38 | -2.842e-13 | -1.252    |
| 10.90 | 0.17161 | 3.400e+38 | -2.474e-13 | -1.136    |
| 11.11 | 0.18421 | 3.400e+38 | -2.506e-13 | -0.8992   |
| 11.32 | 0.20014 | 3.400e+38 | -2.309e-13 | -0.6967   |
| 11.50 | 0.21820 | 3.400e+38 | -2.098e-13 | -0.5243   |
| 11.70 | 0.24504 | 3.400e+38 | -1.860e-13 | -0.3204   |
| 11.90 | 0.27586 | 3.400e+38 | -1.563e-13 | -0.1213   |
| 12.10 | 0.30960 | 3.400e+38 | -1.255e-13 | 0.08358   |
| 12.33 | 0.34394 | 3.400e+38 | -8.997e-14 | 0.3024    |
| 12.51 | 0.36841 | 3.400e+38 | -6.702e-14 | 0.4828    |
| 12.71 | 0.39192 | 3.400e+38 | -4.688e-14 | 0.7016    |
| 12.88 | 0.40514 | 3.400e+38 | -3.344e-14 | 0.8659    |

**2.2 Thiocalix[4]arenetetrasulfonate (4)****2.2.1** Summary of the experimental parameters

|                                                        |            |
|--------------------------------------------------------|------------|
| Temperature/K                                          | 298        |
| p[H] range                                             | 0.97-12.83 |
| Total number of datum points                           | 60         |
| Solution conditions                                    |            |
| Concentration of the compound/ $\mu\text{mol dm}^{-3}$ | 20.45      |
| Ionic strength/ $\text{mol dm}^{-3}$ , electrolyte     | 0.2, NaCl  |

## 2. 2. 2 Calculation of the first acid dissociation constant

### 2. 2. 2. 1 Summary of the calculation parameters

|                            |                                                                                |           |           |
|----------------------------|--------------------------------------------------------------------------------|-----------|-----------|
| Method                     | linear regression analysis of eqn. (11),<br>setting allowable error to be 0.1% |           |           |
| Wavelength/nm              | 300                                                                            | 310       | 320       |
| p[H] range for calculation | 0.97-3.14                                                                      | 1.37-3.35 | 0.97-3.35 |
| Number of datum points     | 8                                                                              | 11        | 13        |
| Inputted $A_{H4L}$         | 0.28300                                                                        | 0.16560   | 0.03707   |
| Inputted $A_{H3L}$         | 0.36850                                                                        | 0.29350   | 0.14500   |

### 2. 2. 2. 2 Results

|                            |                     |                     |                     |
|----------------------------|---------------------|---------------------|---------------------|
| Wavelength/nm              | 300                 | 310                 | 320                 |
| $pK_{a1} \pm \text{error}$ | $2.10_7 \pm 0.01_3$ | $2.18_9 \pm 0.00_9$ | $2.20_0 \pm 0.01_0$ |
| Correlation coefficient    | 0.99815             | 0.99897             | 0.99878             |

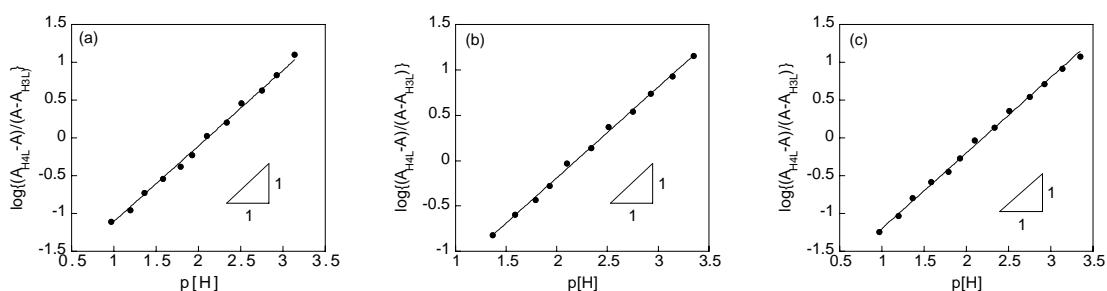

**Figure S-2. 2. 1** Evaluation of the  $pK_{a1}$  value for the calixarene **4**; plots of eqn. (11).

(a)  $\lambda = 300$  nm, (b)  $\lambda = 310$  nm, (c)  $\lambda = 320$  nm.

## 2. 2. 3 Estimation of the $A_{H2L}$ values

### 2. 2. 3. 1 Summary of the calculation parameters

|                            |                                                                                |           |           |
|----------------------------|--------------------------------------------------------------------------------|-----------|-----------|
| Method                     | linear regression analysis of eqn. (27),<br>setting allowable error to be 0.1% |           |           |
| Wavelength/nm              | 330                                                                            | 340       | 350       |
| p[H] range for calculation | 7.37-9.35                                                                      | 7.54-9.35 | 7.37-9.35 |
| Number of datum points     | 13                                                                             | 12        | 13        |
| Inputted $A_{H3L}$         | 0.07760                                                                        | 0.02000   | 0.00270   |

### 2.2.3.2 Results

| Wavelength/nm              | 330                     | 340                     | 350                     |
|----------------------------|-------------------------|-------------------------|-------------------------|
| $A_{H2L} \pm \text{error}$ | $0.2548_9 \pm 0.0035_2$ | $0.1733_5 \pm 0.0041_1$ | $0.1108_3 \pm 0.0032_3$ |
| $pK_{a2} \pm \text{error}$ | $8.55_2 \pm 0.01_5$     | $8.50_2 \pm 0.02_0$     | $8.49_5 \pm 0.02_2$     |
| Correlation coefficient    | 0.99403                 | 0.98953                 | 0.98722                 |

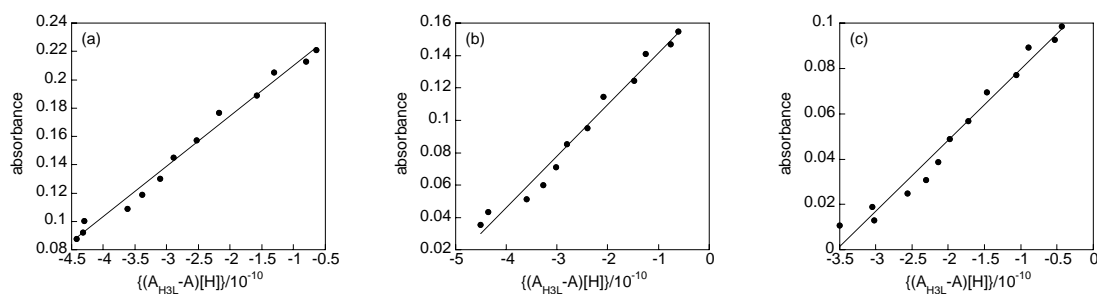

**Figure S-2.2.2** Estimation of the  $A_{H2L}$  values for the calixarene **4**; plots of eqn. (27).

(a)  $\lambda = 330$  nm, (b)  $\lambda = 340$  nm, (c)  $\lambda = 350$  nm.

### 2.2.4 Calculation of the second acid dissociation constant

#### 2.2.4.1 Summary of the calculation parameters

| Method                     | linear regression analysis of eqn. (12),<br>setting allowable error to be 0.1% |           |           |
|----------------------------|--------------------------------------------------------------------------------|-----------|-----------|
| Wavelength/nm              | 330                                                                            | 340       | 350       |
| p[H] range for calculation | 7.37-9.35                                                                      | 7.54-9.35 | 7.37-9.35 |
| Number of datum points     | 13                                                                             | 12        | 13        |
| Inputted $A_{H3L}$         | 0.07760                                                                        | 0.02000   | 0.00270   |
| Inputted $A_{H2L}$         | 0.24589                                                                        | 0.17335   | 0.11083   |

#### 2.2.4.2 Results

| Wavelength/nm              | 330                 | 340                 | 350                 |
|----------------------------|---------------------|---------------------|---------------------|
| $pK_{a2} \pm \text{error}$ | $8.55_4 \pm 0.00_9$ | $8.49_9 \pm 0.01_1$ | $8.49_0 \pm 0.01_2$ |
| Correlation coefficient    | 0.99859             | 0.99779             | 0.99771             |



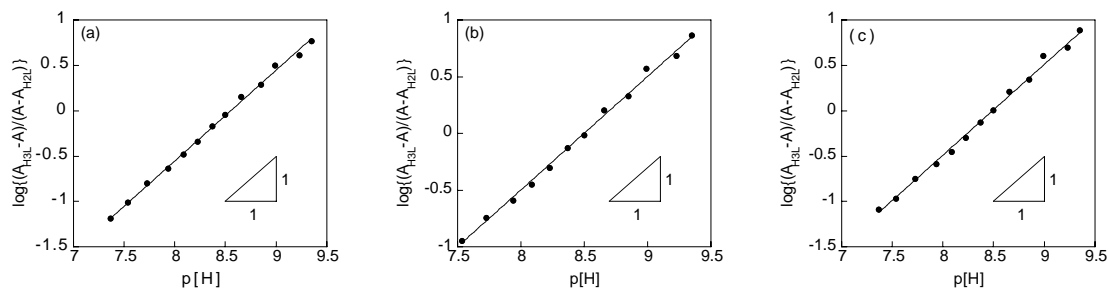

**Figure S-2. 2. 3** Evaluation of the  $pK_{a2}$  value for the calixarene **4**; plots of eqn. (12).

(a)  $\lambda = 330$  nm, (b)  $\lambda = 340$  nm, (c)  $\lambda = 350$  nm.

## 2. 2. 5 Calculation of the third and fourth acid dissociation constant

### 2. 2. 5. 1 Summary of the calculation parameters

|                            |                                                                                       |             |             |
|----------------------------|---------------------------------------------------------------------------------------|-------------|-------------|
| Method                     | curve-fitting regression analysis of eqn. (13),<br>setting allowable error to be 0.1% |             |             |
| Wavelength/nm              | 330                                                                                   | 340         | 350         |
| p[H] range for calculation | 10.56-12.83                                                                           | 10.56-12.83 | 10.56-12.83 |
| Number of datum points     | 16                                                                                    | 16          | 16          |
| Inputted $A_{H2L}$         | 0.24589                                                                               | 0.17335     | 0.11083     |

### 2. 2. 5. 2 Results

|                            |                         |                         |                         |
|----------------------------|-------------------------|-------------------------|-------------------------|
| Wavelength/nm              | 330                     | 340                     | 350                     |
| $pK_{a3} \pm \text{error}$ | $11.94_1 \pm 0.28_3$    | $12.17_8 \pm 0.32_6$    | $12.16_3 \pm 0.30_5$    |
| $pK_{a4} \pm \text{error}$ | $11.72_8 \pm 0.10_8$    | $11.73_0 \pm 0.14_9$    | $11.71_4 \pm 0.14_9$    |
| $A_{HL} \pm \text{error}$  | $0.4174_9 \pm 0.1657_0$ | $0.4114_3 \pm 0.2492_9$ | $0.2712_9 \pm 0.1455_6$ |
| $A_L \pm \text{error}$     | $0.6219_7 \pm 0.0172_5$ | $0.5576_7 \pm 0.0241_5$ | $0.3433_9 \pm 0.0145_6$ |
| Correlation coefficient    | 0.99791                 | 0.99740                 | 0.99741                 |

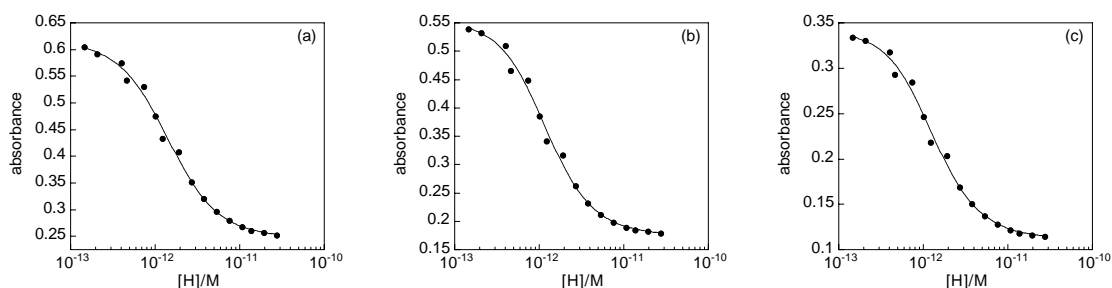

**Figure S-2. 2. 4** Evaluation of the  $pK_{a3}$  and  $pK_{a4}$  values for the calixarene **4**; curve-fittings of eqn.

(13). Solid lines, simulated curves. (a)  $\lambda = 330$  nm, (b)  $\lambda = 340$  nm, (c)  $\lambda = 350$  nm.

**Table S-2.2** Raw data

| (a) at 300 nm |            |                                     |       |            |                                     |
|---------------|------------|-------------------------------------|-------|------------|-------------------------------------|
| p[H]          | absorbance | $\log\{(A_{H_4L}-A)/(A-A_{H_3L})\}$ | p[H]  | absorbance | $\log\{(A_{H_4L}-A)/(A-A_{H_3L})\}$ |
| (1 M HCl)     | 0.28300    | -1.536                              | 8.369 | 0.34296    | 0.3706                              |
| 0.9691        | 0.28922    | -1.105                              | 8.499 | 0.33817    | 0.2598                              |
| 1.199         | 0.29149    | -0.9576                             | 8.659 | 0.33104    | 0.1080                              |
| 1.369         | 0.29661    | -0.7228                             | 8.849 | 0.32707    | 0.02683                             |
| 1.589         | 0.30227    | -0.5362                             | 8.989 | 0.32074    | -0.1023                             |
| 1.789         | 0.30816    | -0.3799                             | 9.229 | 0.31838    | -0.1513                             |
| 1.929         | 0.31497    | -0.2239                             | 9.349 | 0.31534    | -0.2158                             |
| 2.099         | 0.32701    | 0.02561                             | 9.539 | 0.31361    | -0.2536                             |
| 2.339         | 0.33556    | 0.2029                              | 9.679 | 0.31174    | -0.2956                             |
| 2.509         | 0.34641    | 0.4580                              | 9.819 | 0.31106    | -0.3111                             |
| 2.749         | 0.35218    | 0.6273                              | 9.969 | 0.31006    | -0.3344                             |
| 2.929         | 0.35747    | 0.8294                              | 10.13 | 0.30913    | -0.3564                             |
| 3.139         | 0.36229    | 1.106                               | 10.25 | 0.30737    | -0.3994                             |
| 3.349         | 0.36576    | 1.480                               | 10.43 | 0.30658    | -0.4193                             |
| 3.599         | 0.36711    | 1.782                               | 10.56 | 0.30504    | -0.4593                             |
| 3.729         | 0.36762    | 1.983                               | 10.71 | 0.30460    | -0.4710                             |
| 3.939         | 0.36923    | 3.400e+38                           | 10.86 | 0.30293    | -0.5172                             |
| 4.359         | 0.36940    | 3.400e+38                           | 10.97 | 0.30073    | -0.5823                             |
| 4.719         | 0.36963    | 3.400e+38                           | 11.12 | 0.29736    | -0.6950                             |
| 5.169         | 0.36853    | 3.400e+38                           | 11.27 | 0.29314    | -0.8711                             |
| 5.639         | 0.36859    | 3.400e+38                           | 11.42 | 0.28833    | -1.177                              |
| 5.939         | 0.36842    | 3.028                               | 11.57 | 0.28100    | 3.400e+38                           |
| 6.339         | 0.36814    | 2.374                               | 11.72 | 0.27114    | 3.400e+38                           |
| 6.529         | 0.36756    | 1.954                               | 11.91 | 0.26624    | 3.400e+38                           |
| 6.919         | 0.36539    | 1.423                               | 11.99 | 0.25977    | 3.400e+38                           |
| 7.369         | 0.36461    | 1.322                               | 12.13 | 0.25194    | 3.400e+38                           |
| 7.539         | 0.36236    | 1.111                               | 12.33 | 0.25103    | 3.400e+38                           |
| 7.729         | 0.35899    | 0.9026                              | 12.39 | 0.24838    | 3.400e+38                           |
| 7.939         | 0.35658    | 0.7905                              | 12.68 | 0.24588    | 3.400e+38                           |
| 8.089         | 0.35190    | 0.6181                              | 12.83 | 0.24552    | 3.400e+38                           |
| 8.229         | 0.34813    | 0.5048                              |       |            |                                     |

**Table S-2. 2** Raw data (continued)

| (b) at 310 nm |            |                                     |       |            |                                     |
|---------------|------------|-------------------------------------|-------|------------|-------------------------------------|
| p[H]          | absorbance | $\log\{(A_{H_4L}-A)/(A-A_{H_3L})\}$ | p[H]  | absorbance | $\log\{(A_{H_4L}-A)/(A-A_{H_3L})\}$ |
| (1 M HCl)     | 0.16560    | -2.433                              | 8.369 | 0.32050    | 3.400e+38                           |
| 0.9691        | 0.17153    | -1.313                              | 8.499 | 0.32472    | 3.400e+38                           |
| 1.199         | 0.17479    | -1.111                              | 8.659 | 0.33203    | 3.400e+38                           |
| 1.369         | 0.18234    | -0.8222                             | 8.849 | 0.33635    | 3.400e+38                           |
| 1.589         | 0.19148    | -0.5957                             | 8.989 | 0.34268    | 3.400e+38                           |
| 1.789         | 0.19985    | -0.4368                             | 9.229 | 0.34593    | 3.400e+38                           |
| 1.929         | 0.20957    | -0.2808                             | 9.349 | 0.34838    | 3.400e+38                           |
| 2.099         | 0.22716    | -0.03248                            | 9.539 | 0.34993    | 3.400e+38                           |
| 2.339         | 0.23991    | 0.1420                              | 9.679 | 0.35158    | 3.400e+38                           |
| 2.509         | 0.25535    | 0.3715                              | 9.819 | 0.35210    | 3.400e+38                           |
| 2.749         | 0.26492    | 0.5410                              | 9.969 | 0.35286    | 3.400e+38                           |
| 2.929         | 0.27381    | 0.7400                              | 10.13 | 0.35313    | 3.400e+38                           |
| 3.139         | 0.28001    | 0.9285                              | 10.25 | 0.35349    | 3.400e+38                           |
| 3.349         | 0.28511    | 1.154                               | 10.43 | 0.35333    | 3.400e+38                           |
| 3.599         | 0.28655    | 1.241                               | 10.56 | 0.35324    | 3.400e+38                           |
| 3.729         | 0.28900    | 1.438                               | 10.71 | 0.35210    | 3.400e+38                           |
| 3.939         | 0.29129    | 1.755                               | 10.86 | 0.35073    | 3.400e+38                           |
| 4.359         | 0.29214    | 1.969                               | 10.97 | 0.34846    | 3.400e+38                           |
| 4.719         | 0.29197    | 1.917                               | 11.12 | 0.34535    | 3.400e+38                           |
| 5.169         | 0.29274    | 2.223                               | 11.27 | 0.34036    | 3.400e+38                           |
| 5.639         | 0.29338    | 3.027                               | 11.42 | 0.33386    | 3.400e+38                           |
| 5.939         | 0.29373    | 3.400e+38                           | 11.57 | 0.32418    | 3.400e+38                           |
| 6.339         | 0.29431    | 3.400e+38                           | 11.72 | 0.30710    | 3.400e+38                           |
| 6.529         | 0.29595    | 3.400e+38                           | 11.91 | 0.30018    | 3.400e+38                           |
| 6.919         | 0.29638    | 3.400e+38                           | 11.99 | 0.28716    | 1.283                               |
| 7.369         | 0.29817    | 3.400e+38                           | 12.13 | 0.27015    | 0.6510                              |
| 7.539         | 0.30001    | 3.400e+38                           | 12.33 | 0.26682    | 0.5791                              |
| 7.729         | 0.30325    | 3.400e+38                           | 12.39 | 0.25666    | 0.3930                              |
| 7.939         | 0.30655    | 3.400e+38                           | 12.68 | 0.25102    | 0.3034                              |
| 8.089         | 0.31066    | 3.400e+38                           | 12.83 | 0.25364    | 0.3441                              |
| 8.229         | 0.31438    | 3.400e+38                           |       |            |                                     |

**Table S-2. 2** Raw data (continued)

| (c) at 320 nm |            |                                     |       |            |                                     |
|---------------|------------|-------------------------------------|-------|------------|-------------------------------------|
| p[H]          | absorbance | $\log\{(A_{H_4L}-A)/(A-A_{H_3L})\}$ | p[H]  | absorbance | $\log\{(A_{H_4L}-A)/(A-A_{H_3L})\}$ |
| (1 M HCl)     | 0.037070   | -1.630                              | 8.369 | 0.22459    | 3.400e+38                           |
| 0.9691        | 0.042890   | -1.244                              | 8.499 | 0.23815    | 3.400e+38                           |
| 1.199         | 0.046270   | -1.031                              | 8.659 | 0.26040    | 3.400e+38                           |
| 1.369         | 0.052070   | -0.7921                             | 8.849 | 0.27323    | 3.400e+38                           |
| 1.589         | 0.059290   | -0.5863                             | 8.989 | 0.29196    | 3.400e+38                           |
| 1.789         | 0.065670   | -0.4431                             | 9.229 | 0.30097    | 3.400e+38                           |
| 1.929         | 0.074760   | -0.2704                             | 9.349 | 0.31013    | 3.400e+38                           |
| 2.099         | 0.088910   | -0.03422                            | 9.539 | 0.31579    | 3.400e+38                           |
| 2.339         | 0.099610   | 0.1392                              | 9.679 | 0.32016    | 3.400e+38                           |
| 2.509         | 0.11223    | 0.3605                              | 9.819 | 0.32283    | 3.400e+38                           |
| 2.749         | 0.12107    | 0.5453                              | 9.969 | 0.32692    | 3.400e+38                           |
| 2.929         | 0.12742    | 0.7109                              | 10.13 | 0.32940    | 3.400e+38                           |
| 3.139         | 0.13339    | 0.9189                              | 10.25 | 0.33170    | 3.400e+38                           |
| 3.349         | 0.13674    | 1.082                               | 10.43 | 0.33377    | 3.400e+38                           |
| 3.599         | 0.13860    | 1.200                               | 10.56 | 0.33699    | 3.400e+38                           |
| 3.729         | 0.14072    | 1.384                               | 10.71 | 0.33860    | 3.400e+38                           |
| 3.939         | 0.14216    | 1.568                               | 10.86 | 0.34017    | 3.400e+38                           |
| 4.359         | 0.14353    | 1.860                               | 10.97 | 0.34311    | 3.400e+38                           |
| 4.719         | 0.14453    | 2.359                               | 11.12 | 0.34687    | 3.400e+38                           |
| 5.169         | 0.14510    | 3.400e+38                           | 11.27 | 0.35139    | 3.400e+38                           |
| 5.639         | 0.14517    | 3.400e+38                           | 11.42 | 0.35675    | 3.400e+38                           |
| 5.939         | 0.14637    | 3.400e+38                           | 11.57 | 0.36241    | 3.400e+38                           |
| 6.339         | 0.14754    | 3.400e+38                           | 11.72 | 0.37221    | 3.400e+38                           |
| 6.529         | 0.15034    | 3.400e+38                           | 11.91 | 0.37572    | 3.400e+38                           |
| 6.919         | 0.15535    | 3.400e+38                           | 11.99 | 0.38007    | 3.400e+38                           |
| 7.369         | 0.15859    | 3.400e+38                           | 12.13 | 0.38316    | 3.400e+38                           |
| 7.539         | 0.16559    | 3.400e+38                           | 12.33 | 0.38453    | 3.400e+38                           |
| 7.729         | 0.17376    | 3.400e+38                           | 12.39 | 0.38430    | 3.400e+38                           |
| 7.939         | 0.18395    | 3.400e+38                           | 12.68 | 0.38302    | 3.400e+38                           |
| 8.089         | 0.19527    | 3.400e+38                           | 12.83 | 0.39271    | 3.400e+38                           |
| 8.229         | 0.20801    | 3.400e+38                           |       |            |                                     |

**Table S-2.2** Raw data (continued)

| (d) at 330 nm |            |                     |                                         |
|---------------|------------|---------------------|-----------------------------------------|
| p[H]          | absorbance | $(A_{H_3L} - A)[H]$ | $\log\{(A_{H_3L} - A)/(A - A_{H_2L})\}$ |
| (1 M HCl)     | 0.0054800  |                     | 3.400e+38                               |
| 0.9691        | 0.0077600  | 0.007499            | 3.400e+38                               |
| 1.199         | 0.0093400  | 0.004316            | 3.400e+38                               |
| 1.369         | 0.013460   | 0.002742            | 3.400e+38                               |
| 1.589         | 0.018420   | 0.001524            | 3.400e+38                               |
| 1.789         | 0.022990   | 0.0008876           | 3.400e+38                               |
| 1.929         | 0.029020   | 0.0005720           | 3.400e+38                               |
| 2.099         | 0.037770   | 0.0003171           | 3.400e+38                               |
| 2.339         | 0.044690   | 0.0001507           | 3.400e+38                               |
| 2.509         | 0.052920   | 7.643e-05           | 3.400e+38                               |
| 2.749         | 0.058630   | 3.381e-05           | 3.400e+38                               |
| 2.929         | 0.063530   | 1.657e-05           | 3.400e+38                               |
| 3.139         | 0.066740   | 7.884e-06           | 3.400e+38                               |
| 3.349         | 0.069150   | 3.782e-06           | 3.400e+38                               |
| 3.599         | 0.070390   | 1.815e-06           | 3.400e+38                               |
| 3.729         | 0.072040   | 1.038e-06           | 3.400e+38                               |
| 3.939         | 0.072960   | 5.339e-07           | 3.400e+38                               |
| 4.359         | 0.073850   | 1.640e-07           | 3.400e+38                               |
| 4.719         | 0.074200   | 6.492e-08           | 3.400e+38                               |
| 5.169         | 0.075230   | 1.606e-08           | 3.400e+38                               |
| 5.639         | 0.075950   | 3.788e-09           | 3.400e+38                               |
| 5.939         | 0.077600   | -2.634e-15          | -7.866                                  |
| 6.339         | 0.077620   | -9.161e-12          | -3.925                                  |
| 6.529         | 0.080100   | -7.394e-10          | -1.822                                  |
| 6.919         | 0.084150   | -7.892e-10          | -1.393                                  |
| 7.369         | 0.087920   | -4.412e-10          | -1.185                                  |
| 7.539         | 0.092540   | -4.318e-10          | -1.011                                  |
| 7.729         | 0.10064    | -4.299e-10          | -0.7996                                 |
| 7.939         | 0.10907    | -3.621e-10          | -0.6383                                 |
| 8.089         | 0.11920    | -3.389e-10          | -0.4836                                 |
| 8.229         | 0.13015    | -3.101e-10          | -0.3429                                 |
| 8.369         | 0.14522    | -2.891e-10          | -0.1728                                 |
| 8.499         | 0.15724    | -2.524e-10          | -0.04655                                |
| 8.659         | 0.17659    | -2.170e-10          | 0.1549                                  |

**Table S-2. 2** Raw data (continued)

|       |         |            |           |
|-------|---------|------------|-----------|
| 8.849 | 0.18886 | -1.575e-10 | 0.2902    |
| 8.989 | 0.20533 | -1.310e-10 | 0.4982    |
| 9.229 | 0.21283 | -7.980e-11 | 0.6118    |
| 9.349 | 0.22130 | -6.432e-11 | 0.7667    |
| 9.539 | 0.22628 | -4.297e-11 | 0.8798    |
| 9.679 | 0.23133 | -3.219e-11 | 1.024     |
| 9.819 | 0.23381 | -2.369e-11 | 1.112     |
| 9.969 | 0.23735 | -1.715e-11 | 1.272     |
| 10.13 | 0.24007 | -1.207e-11 | 1.446     |
| 10.25 | 0.24367 | -9.359e-12 | 1.874     |
| 10.43 | 0.24629 | -6.281e-12 | 3.400e+38 |
| 10.56 | 0.25128 | -4.794e-12 | 3.400e+38 |
| 10.71 | 0.25623 | -3.490e-12 | 3.400e+38 |
| 10.86 | 0.26068 | -2.533e-12 | 3.400e+38 |
| 10.97 | 0.26782 | -2.043e-12 | 3.400e+38 |
| 11.12 | 0.27961 | -1.536e-12 | 3.400e+38 |
| 11.27 | 0.29639 | -1.177e-12 | 3.400e+38 |
| 11.42 | 0.31983 | -9.229e-13 | 3.400e+38 |
| 11.57 | 0.35101 | -7.375e-13 | 3.400e+38 |
| 11.72 | 0.40767 | -6.303e-13 | 3.400e+38 |
| 11.91 | 0.43265 | -4.377e-13 | 3.400e+38 |
| 11.99 | 0.47497 | -4.075e-13 | 3.400e+38 |
| 12.13 | 0.52966 | -3.358e-13 | 3.400e+38 |
| 12.33 | 0.54253 | -2.179e-13 | 3.400e+38 |
| 12.39 | 0.57510 | -2.031e-13 | 3.400e+38 |
| 12.68 | 0.59190 | -1.077e-13 | 3.400e+38 |
| 12.83 | 0.60444 | -7.809e-14 | 3.400e+38 |

(e) at 340 nm

| p[H]      | absorbance | $(A_{H_3L} - A)[H]$ | $\log\{(A_{H_3L} - A)/(A - A_{H_2L})\}$ |
|-----------|------------|---------------------|-----------------------------------------|
| (1 M HCl) | 0.00087000 |                     | 3.400e+38                               |
| 0.9691    | 0.0015000  | 0.001987            | 3.400e+38                               |
| 1.199     | 0.0024400  | 0.001110            | 3.400e+38                               |
| 1.369     | 0.0031400  | 0.0007207           | 3.400e+38                               |
| 1.589     | 0.0053900  | 0.0003763           | 3.400e+38                               |
| 1.789     | 0.0056400  | 0.0002334           | 3.400e+38                               |

**Table S-2. 2** Raw data (continued)

|       |           |            |           |
|-------|-----------|------------|-----------|
| 1.929 | 0.0068200 | 0.0001552  | 3.400e+38 |
| 2.099 | 0.0094800 | 8.374e-05  | 3.400e+38 |
| 2.339 | 0.011510  | 3.889e-05  | 3.400e+38 |
| 2.509 | 0.012440  | 2.341e-05  | 3.400e+38 |
| 2.749 | 0.014280  | 1.019e-05  | 3.400e+38 |
| 2.929 | 0.015850  | 4.886e-06  | 3.400e+38 |
| 3.139 | 0.015070  | 3.579e-06  | 3.400e+38 |
| 3.349 | 0.017300  | 1.209e-06  | 3.400e+38 |
| 3.599 | 0.016570  | 8.634e-07  | 3.400e+38 |
| 3.729 | 0.016710  | 6.139e-07  | 3.400e+38 |
| 3.939 | 0.017010  | 3.440e-07  | 3.400e+38 |
| 4.359 | 0.017600  | 1.050e-07  | 3.400e+38 |
| 4.719 | 0.019470  | 1.012e-08  | 3.400e+38 |
| 5.169 | 0.019720  | 1.897e-09  | 3.400e+38 |
| 5.639 | 0.020370  | -8.494e-10 | -2.616    |
| 5.939 | 0.020120  | -1.381e-10 | -3.106    |
| 6.339 | 0.022640  | -1.209e-09 | -1.757    |
| 6.529 | 0.024300  | -1.272e-09 | -1.540    |
| 6.919 | 0.027260  | -8.747e-10 | -1.304    |
| 7.369 | 0.029530  | -4.074e-10 | -1.179    |
| 7.539 | 0.035600  | -4.509e-10 | -0.9460   |
| 7.729 | 0.043310  | -4.350e-10 | -0.7465   |
| 7.939 | 0.051270  | -3.598e-10 | -0.5915   |
| 8.089 | 0.060050  | -3.262e-10 | -0.4516   |
| 8.229 | 0.071100  | -3.015e-10 | -0.3012   |
| 8.369 | 0.085490  | -2.800e-10 | -0.1276   |
| 8.499 | 0.095410  | -2.390e-10 | -0.01433  |
| 8.659 | 0.11460   | -2.074e-10 | 0.2069    |
| 8.849 | 0.12451   | -1.479e-10 | 0.3304    |
| 8.989 | 0.14107   | -1.242e-10 | 0.5741    |
| 9.229 | 0.14706   | -7.498e-11 | 0.6842    |
| 9.349 | 0.15505   | -6.045e-11 | 0.8680    |
| 9.539 | 0.15952   | -4.032e-11 | 1.004     |
| 9.679 | 0.16389   | -3.013e-11 | 1.182     |
| 9.819 | 0.16689   | -2.228e-11 | 1.357     |
| 9.969 | 0.16907   | -1.601e-11 | 1.542     |

**Table S-2.2** Raw data (continued)

|       |         |            |           |
|-------|---------|------------|-----------|
| 10.13 | 0.17065 | -1.119e-11 | 1.747     |
| 10.25 | 0.17410 | -8.684e-12 | 3.400e+38 |
| 10.43 | 0.17500 | -5.771e-12 | 3.400e+38 |
| 10.56 | 0.17870 | -4.380e-12 | 3.400e+38 |
| 10.71 | 0.18215 | -3.168e-12 | 3.400e+38 |
| 10.86 | 0.18465 | -2.278e-12 | 3.400e+38 |
| 10.97 | 0.18887 | -1.813e-12 | 3.400e+38 |
| 11.12 | 0.19733 | -1.348e-12 | 3.400e+38 |
| 11.27 | 0.21108 | -1.028e-12 | 3.400e+38 |
| 11.42 | 0.23145 | -8.056e-13 | 3.400e+38 |
| 11.57 | 0.26209 | -6.530e-13 | 3.400e+38 |
| 11.72 | 0.31599 | -5.652e-13 | 3.400e+38 |
| 11.91 | 0.34088 | -3.956e-13 | 3.400e+38 |
| 11.99 | 0.38529 | -3.746e-13 | 3.400e+38 |
| 12.13 | 0.44902 | -3.187e-13 | 3.400e+38 |
| 12.33 | 0.46567 | -2.089e-13 | 3.400e+38 |
| 12.39 | 0.50938 | -1.998e-13 | 3.400e+38 |
| 12.68 | 0.53240 | -1.073e-13 | 3.400e+38 |
| 12.83 | 0.53902 | -7.693e-14 | 3.400e+38 |

(f) at 350 nm

| p[H]      | absorbance  | $(A_{H_3L} - A)[H]$ | $\log\{(A_{H_3L} - A)/(A - A_{H_2L})\}$ |
|-----------|-------------|---------------------|-----------------------------------------|
| (1 M HCl) | -0.00095000 |                     | 3.400e+38                               |
| 0.9691    | -0.00037000 | 0.0003297           | 3.400e+38                               |
| 1.199     | 8.0000e-05  | 0.0001657           | 3.400e+38                               |
| 1.369     | 0.00021000  | 0.0001064           | 3.400e+38                               |
| 1.589     | 6.0000e-05  | 6.800e-05           | 3.400e+38                               |
| 1.789     | 0.00095000  | 2.844e-05           | 3.400e+38                               |
| 1.929     | 0.00046000  | 2.637e-05           | 3.400e+38                               |
| 2.099     | 0.00095000  | 1.393e-05           | 3.400e+38                               |
| 2.339     | 0.0017900   | 4.168e-06           | 3.400e+38                               |
| 2.509     | 0.0016400   | 3.283e-06           | 3.400e+38                               |
| 2.749     | 0.0026200   | 1.426e-07           | 3.400e+38                               |
| 2.929     | 0.0019600   | 8.713e-07           | 3.400e+38                               |
| 3.139     | 0.0025300   | 1.234e-07           | 3.400e+38                               |
| 3.349     | 0.0023800   | 1.432e-07           | 3.400e+38                               |



**Table S-2. 2** Raw data (continued)

|       |           |            |           |
|-------|-----------|------------|-----------|
| 3.599 | 0.0026600 | 1.007e-08  | 3.400e+38 |
| 3.729 | 0.0022300 | 8.770e-08  | 3.400e+38 |
| 3.939 | 0.0024500 | 2.876e-08  | 3.400e+38 |
| 4.359 | 0.0021400 | 2.450e-08  | 3.400e+38 |
| 4.719 | 0.0025200 | 3.437e-09  | 3.400e+38 |
| 5.169 | 0.0027800 | -5.420e-10 | -3.131    |
| 5.639 | 0.0025400 | 3.673e-10  | 3.400e+38 |
| 5.939 | 0.0044500 | -2.014e-09 | -1.784    |
| 6.339 | 0.0041600 | -6.688e-10 | -1.864    |
| 6.529 | 0.0054100 | -8.015e-10 | -1.590    |
| 6.919 | 0.0084500 | -6.928e-10 | -1.251    |
| 7.369 | 0.010880  | -3.497e-10 | -1.087    |
| 7.539 | 0.013150  | -3.020e-10 | -0.9707   |
| 7.729 | 0.019040  | -3.049e-10 | -0.7495   |
| 7.939 | 0.024930  | -2.558e-10 | -0.5871   |
| 8.089 | 0.030950  | -2.301e-10 | -0.4514   |
| 8.229 | 0.038830  | -2.132e-10 | -0.2995   |
| 8.369 | 0.048860  | -1.973e-10 | -0.1279   |
| 8.499 | 0.056930  | -1.719e-10 | 0.002651  |
| 8.659 | 0.069520  | -1.465e-10 | 0.2089    |
| 8.849 | 0.077290  | -1.056e-10 | 0.3471    |
| 8.989 | 0.089260  | -8.876e-11 | 0.6035    |
| 9.229 | 0.092650  | -5.308e-11 | 0.6944    |
| 9.349 | 0.098520  | -4.289e-11 | 0.8912    |
| 9.539 | 0.10121   | -2.847e-11 | 1.010     |
| 9.679 | 0.10429   | -2.127e-11 | 1.191     |
| 9.819 | 0.10657   | -1.575e-11 | 1.387     |
| 9.969 | 0.10829   | -1.134e-11 | 1.619     |
| 10.13 | 0.10906   | -7.901e-12 | 1.779     |
| 10.25 | 0.11101   | -6.104e-12 | 3.400e+38 |
| 10.43 | 0.11238   | -4.084e-12 | 3.400e+38 |
| 10.56 | 0.11431   | -3.081e-12 | 3.400e+38 |
| 10.71 | 0.11578   | -2.210e-12 | 3.400e+38 |
| 10.86 | 0.11801   | -1.595e-12 | 3.400e+38 |
| 10.97 | 0.12158   | -1.277e-12 | 3.400e+38 |
| 11.12 | 0.12797   | -9.523e-13 | 3.400e+38 |

**Table S-2. 2** Raw data (continued)

|       |         |            |           |
|-------|---------|------------|-----------|
| 11.27 | 0.13705 | -7.230e-13 | 3.400e+38 |
| 11.42 | 0.15053 | -5.632e-13 | 3.400e+38 |
| 11.57 | 0.16898 | -4.485e-13 | 3.400e+38 |
| 11.72 | 0.20349 | -3.834e-13 | 3.400e+38 |
| 11.91 | 0.21825 | -2.657e-13 | 3.400e+38 |
| 11.99 | 0.24618 | -2.497e-13 | 3.400e+38 |
| 12.13 | 0.28457 | -2.094e-13 | 3.400e+38 |
| 12.33 | 0.29315 | -1.361e-13 | 3.400e+38 |
| 12.39 | 0.31751 | -1.285e-13 | 3.400e+38 |
| 12.68 | 0.33062 | -6.866e-14 | 3.400e+38 |
| 12.83 | 0.33359 | -4.905e-14 | 3.400e+38 |

### 2. 3 Sulfonylcalix[4]arenetetrasulfonate (5) in the absence of electrolyte

#### 2. 3. 1 Summary of the experimental parameters

|                                                        |                |
|--------------------------------------------------------|----------------|
| Temperature/K                                          | 298            |
| p[H] range                                             | 4.38-10.02     |
| Total number of datum points                           | 30             |
| Solution conditions                                    |                |
| Concentration of the compound/ $\mu\text{mol dm}^{-3}$ | 20.45          |
| Ionic strength/ $\text{mol dm}^{-3}$ , electrolyte     | < 0.0008, none |

#### 2. 3. 2 Calculation of the third and fourth acid dissociation constant

##### 2. 3. 2. 1 Summary of the calculation parameters

|                            |                                                                                       |            |            |
|----------------------------|---------------------------------------------------------------------------------------|------------|------------|
| Method                     | curve-fitting regression analysis of eqn. (13),<br>setting allowable error to be 0.1% |            |            |
| Wavelength/nm              | 340                                                                                   | 345        | 350        |
| p[H] range for calculation | 4.38-10.02                                                                            | 4.38-10.02 | 4.38-10.02 |
| Number of datum points     | 30                                                                                    | 30         | 30         |
| Inputted $A_{\text{H2L}}$  | 0.27900                                                                               | 0.30700    | 0.30300    |
| Inputted $A_{\text{L}}$    | 0.66000                                                                               | 0.72500    | 0.63270    |

### 2.3.2.2 Results

|                            |                         |                         |                         |
|----------------------------|-------------------------|-------------------------|-------------------------|
| Wavelength/nm              | 340                     | 345                     | 350                     |
| $pK_{a3} \pm \text{error}$ | $6.84_7 \pm 0.03_9$     | $6.72_2 \pm 0.06_3$     | $6.69_1 \pm 0.07_8$     |
| $pK_{a4} \pm \text{error}$ | $6.73_5 \pm 0.03_7$     | $6.73_6 \pm 0.02_9$     | $6.78_4 \pm 0.03_6$     |
| $A_{HL} \pm \text{error}$  | $0.4568_1 \pm 0.0296_7$ | $0.4041_1 \pm 0.0314_8$ | $0.3874_6 \pm 0.0296_7$ |
| Correlation coefficient    | 0.99987                 | 0.99983                 | 0.99978                 |

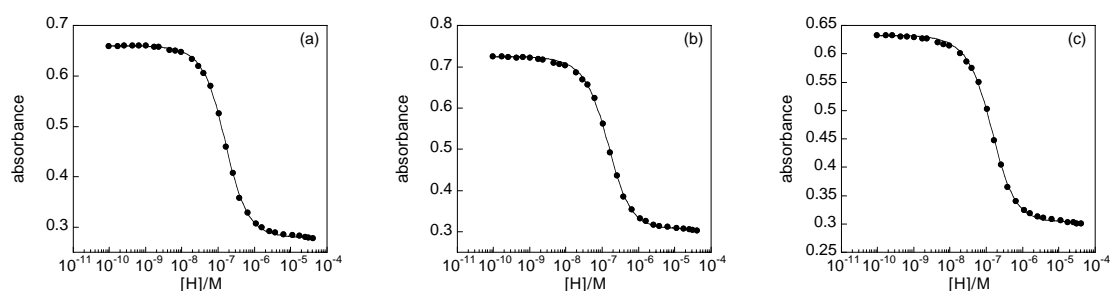

**Figure S-2.3.1** Evaluation of the  $pK_{a3}$  and  $pK_{a4}$  values for the calixarene **5**; curve-fittings of eqn. (13). Solid lines, simulated curves. (a)  $\lambda = 340$  nm, (b)  $\lambda = 345$  nm, (c)  $\lambda = 350$  nm.

**Table S-2.3** Raw data

| p[H]  | absorbance at 340 nm | absorbance at 345 nm | absorbance at 350 nm |
|-------|----------------------|----------------------|----------------------|
| 4.380 | 0.27872              | 0.30268              | 0.30062              |
| 4.500 | 0.27911              | 0.30468              | 0.30131              |
| 4.590 | 0.28055              | 0.30643              | 0.30316              |
| 4.750 | 0.28386              | 0.30779              | 0.30338              |
| 4.950 | 0.28489              | 0.31013              | 0.30693              |
| 5.200 | 0.28654              | 0.31218              | 0.30906              |
| 5.420 | 0.28962              | 0.31414              | 0.31116              |
| 5.580 | 0.29269              | 0.31785              | 0.31377              |
| 5.800 | 0.29964              | 0.32567              | 0.31975              |
| 5.950 | 0.30748              | 0.33329              | 0.32485              |
| 6.190 | 0.32870              | 0.35399              | 0.34076              |
| 6.420 | 0.35899              | 0.38522              | 0.36523              |
| 6.590 | 0.40743              | 0.43628              | 0.40463              |
| 6.780 | 0.46031              | 0.49287              | 0.44847              |
| 6.980 | 0.52608              | 0.56205              | 0.50309              |
| 7.210 | 0.58057              | 0.62465              | 0.55083              |
| 7.400 | 0.60670              | 0.65705              | 0.57565              |

**Table S-2.3** Raw data (continued)

|       |         |         |         |
|-------|---------|---------|---------|
| 7.540 | 0.61973 | 0.66974 | 0.58664 |
| 7.730 | 0.63360 | 0.68759 | 0.60113 |
| 8.030 | 0.64794 | 0.70434 | 0.61509 |
| 8.180 | 0.65027 | 0.70719 | 0.61758 |
| 8.350 | 0.65141 | 0.71030 | 0.62048 |
| 8.640 | 0.65789 | 0.71847 | 0.62802 |
| 8.760 | 0.65798 | 0.71992 | 0.62812 |
| 8.990 | 0.66082 | 0.72256 | 0.63012 |
| 9.200 | 0.66106 | 0.72352 | 0.63086 |
| 9.370 | 0.66082 | 0.72317 | 0.63127 |
| 9.590 | 0.66127 | 0.72407 | 0.63294 |
| 9.780 | 0.65991 | 0.72537 | 0.63278 |
| 10.02 | 0.65980 | 0.72521 | 0.63281 |

**2.4 Sulfonylcalix[4]arenetetrasulfonate (5) at the ionic strength of 0.2 mol dm<sup>-3</sup>****2.4.1** Summary of the experimental parameters

|                                                        |            |
|--------------------------------------------------------|------------|
| Temperature/K                                          | 298        |
| p[H] range                                             | 0.97-12.51 |
| Total number of datum points                           | 52         |
| Solution conditions                                    |            |
| Concentration of the compound/ $\mu\text{mol dm}^{-3}$ | 20.45      |
| Ionic strength/mol dm <sup>-3</sup> , electrolyte      | 0.2, NaCl  |

**2.4.2** Estimation of the  $A_{\text{H3L}}$  values**2.4.2.1** Summary of the calculation parameters

|                            |                                                                                |           |           |
|----------------------------|--------------------------------------------------------------------------------|-----------|-----------|
| Method                     | linear regression analysis of eqn. (28),<br>setting allowable error to be 0.1% |           |           |
| Wavelength/nm              | 340                                                                            | 345       | 350       |
| p[H] range for calculation | 0.97-1.88                                                                      | 0.97-1.88 | 0.97-1.72 |
| Number of datum points     | 6                                                                              | 6         | 5         |
| Inputted $A_{\text{H2L}}$  | 0.27900                                                                        | 0.30700   | 0.30300   |

### 2.4.2.2 Results

|                            |                         |                         |                         |
|----------------------------|-------------------------|-------------------------|-------------------------|
| Wavelength/nm              | 340                     | 345                     | 350                     |
| $A_{H3L} \pm \text{error}$ | $0.1182_5 \pm 0.0028_6$ | $0.1249_5 \pm 0.0028_6$ | $0.1177_3 \pm 0.0015_0$ |
| $pK_{a2} \pm \text{error}$ | $1.30_3 \pm 0.01_3$     | $1.30_3 \pm 0.01_2$     | $1.26_8 \pm 0.00_6$     |
| Correlation coefficient    | 0.99812                 | 0.99854                 | 0.99967                 |

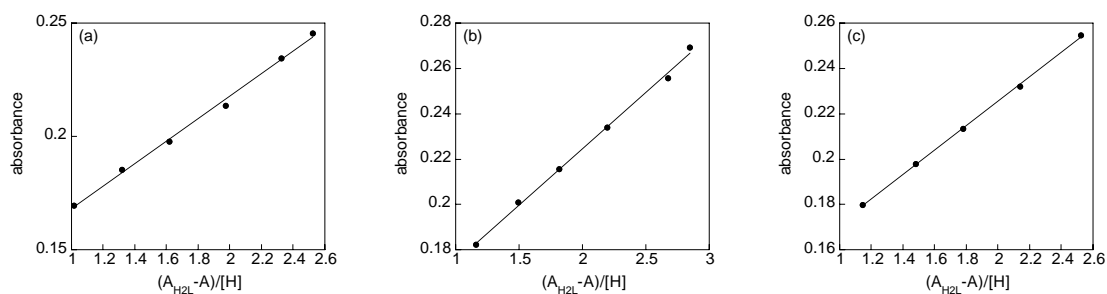

**Figure S-2.4.1** Estimation of the  $A_{H3L}$  values for the calixarene **5**; plots of eqn. (28).

(a)  $\lambda = 340$  nm, (b)  $\lambda = 345$  nm, (c)  $\lambda = 350$  nm.

### 2.4.3 Calculation of the second acid dissociation constant

#### 2.4.3.1 Summary of the calculation parameters

|                            |                                                                                |           |           |
|----------------------------|--------------------------------------------------------------------------------|-----------|-----------|
| Method                     | linear regression analysis of eqn. (12),<br>setting allowable error to be 0.1% |           |           |
| Wavelength/nm              | 340                                                                            | 340       | 350       |
| p[H] range for calculation | 0.97-2.03                                                                      | 0.97-2.03 | 0.97-1.88 |
| Number of datum points     | 7                                                                              | 7         | 6         |
| Inputted $A_{H3L}$         | 0.11825                                                                        | 0.12495   | 0.11773   |
| Inputted $A_{H2L}$         | 0.27900                                                                        | 0.30700   | 0.30300   |

#### 2.4.3.2 Results

|                            |                     |                     |                     |
|----------------------------|---------------------|---------------------|---------------------|
| Wavelength/nm              | 340                 | 340                 | 350                 |
| $pK_{a2} \pm \text{error}$ | $1.30_0 \pm 0.00_4$ | $1.29_6 \pm 0.00_7$ | $1.23_8 \pm 0.00_4$ |
| Correlation coefficient    | 0.99965             | 0.99897             | 0.99956             |

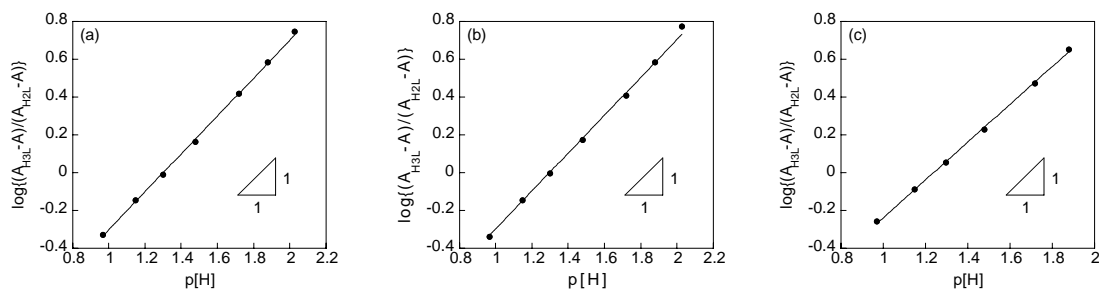

**Figure S-2.4.2** Evaluation of the  $pK_{a2}$  value for the calixarene **5**; plots of eqn. (12).

(a)  $\lambda = 340$  nm, (b)  $\lambda = 345$  nm, (c)  $\lambda = 350$  nm.

#### 2.4.4 Calculation of the third and fourth acid dissociation constant

##### 2.4.4.1 Summary of the calculation parameters

| Method                     | curve-fitting regression analysis of eqn. (13),<br>setting allowable error to be 0.1% |           |           |
|----------------------------|---------------------------------------------------------------------------------------|-----------|-----------|
| Wavelength/nm              | 340                                                                                   | 345       | 350       |
| p[H] range for calculation | 3.41-7.77                                                                             | 3.41-7.77 | 3.41-7.77 |
| Number of datum points     | 26                                                                                    | 26        | 26        |
| Inputted $A_{H2L}$         | 0.27900                                                                               | 0.30700   | 0.30300   |
| Inputted $A_L$             | 0.66000                                                                               | 0.72500   | 0.63270   |

##### 2.4.4.2 Results

|                            |                         |                         |                         |
|----------------------------|-------------------------|-------------------------|-------------------------|
| Wavelength/nm              | 340                     | 345                     | 350                     |
| $pK_{a3} \pm \text{error}$ | $4.68_0 \pm 0.01_7$     | $4.55_2 \pm 0.01_5$     | $4.72_5 \pm 0.01_8$     |
| $pK_{a4} \pm \text{error}$ | $4.56_0 \pm 0.03_3$     | $4.39_2 \pm 0.01_0$     | $4.53_6 \pm 0.02_6$     |
| $A_{HL} \pm \text{error}$  | $0.5585_7 \pm 0.0176_3$ | $0.4844_7 \pm 0.0094_2$ | $0.5681_9 \pm 0.0111_8$ |
| Correlation coefficient    | 0.99990                 | 0.99998                 | 0.99994                 |

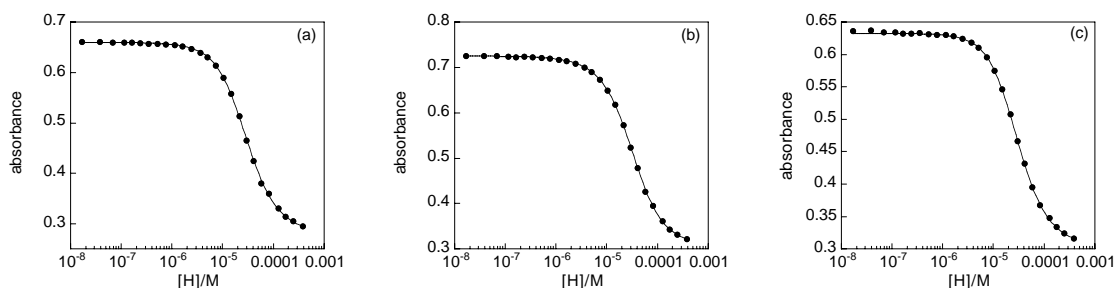

**Figure S-2.4.3** Evaluation of the  $pK_{a3}$  and  $pK_{a4}$  values for the calixarene **5**; curve-fittings of eqn.

(13). Solid lines, simulated curves. (a)  $\lambda = 340$  nm, (b)  $\lambda = 345$  nm, (c)  $\lambda = 350$  nm.

**Table S-2.4** Raw data

| (a) at 340 nm |            |                      |                                         |
|---------------|------------|----------------------|-----------------------------------------|
| p[H]          | absorbance | $(A_{H_2L} - A)/[H]$ | $\log\{(A_{H_2L} - A)/(A - A_{H_2L})\}$ |
| 0.9691        | 0.16968    | 1.018                | -0.3275                                 |
| 1.149         | 0.18526    | 1.321                | -0.1458                                 |
| 1.299         | 0.19766    | 1.620                | -0.01043                                |
| 1.479         | 0.21349    | 1.974                | 0.1625                                  |
| 1.719         | 0.23455    | 2.328                | 0.4177                                  |
| 1.879         | 0.24565    | 2.524                | 0.5821                                  |
| 2.029         | 0.25447    | 2.623                | 0.7445                                  |
| 2.159         | 0.26174    | 2.490                | 0.9198                                  |
| 2.369         | 0.26912    | 2.311                | 1.184                                   |
| 2.509         | 0.27278    | 2.008                | 1.395                                   |
| 2.709         | 0.27812    | 0.4504               | 2.259                                   |
| 2.869         | 0.28267    | -2.715               | 3.400e+38                               |
| 3.029         | 0.28586    | -7.335               | 3.400e+38                               |
| 3.199         | 0.28807    | -14.34               | 3.400e+38                               |
| 3.409         | 0.29500    | -41.04               | 3.400e+38                               |
| 3.599         | 0.30554    | -105.4               | 3.400e+38                               |
| 3.749         | 0.31372    | -194.8               | 3.400e+38                               |
| 3.899         | 0.33090    | -411.4               | 3.400e+38                               |
| 4.079         | 0.36016    | -973.7               | 3.400e+38                               |
| 4.229         | 0.37980    | -1708                | 3.400e+38                               |
| 4.389         | 0.42385    | -3548                | 3.400e+38                               |
| 4.519         | 0.46511    | -6150                | 3.400e+38                               |
| 4.669         | 0.51310    | -1.093e+04           | 3.400e+38                               |
| 4.829         | 0.55788    | -1.881e+04           | 3.400e+38                               |
| 4.979         | 0.59021    | -2.966e+04           | 3.400e+38                               |
| 5.129         | 0.61324    | -4.499e+04           | 3.400e+38                               |
| 5.299         | 0.63047    | -6.998e+04           | 3.400e+38                               |
| 5.439         | 0.63969    | -9.913e+04           | 3.400e+38                               |
| 5.609         | 0.64699    | -1.496e+05           | 3.400e+38                               |
| 5.789         | 0.65177    | -2.294e+05           | 3.400e+38                               |
| 5.939         | 0.65433    | -3.262e+05           | 3.400e+38                               |
| 6.119         | 0.65634    | -4.964e+05           | 3.400e+38                               |
| 6.279         | 0.65666    | -7.181e+05           | 3.400e+38                               |
| 6.459         | 0.65697    | -1.088e+06           | 3.400e+38                               |

**Table S-2.4** Raw data (continued)

|       |         |            |           |
|-------|---------|------------|-----------|
| 6.619 | 0.65811 | -1.577e+06 | 3.400e+38 |
| 6.779 | 0.65902 | -2.285e+06 | 3.400e+38 |
| 6.939 | 0.66014 | -3.313e+06 | 3.400e+38 |
| 7.169 | 0.65977 | -5.620e+06 | 3.400e+38 |
| 7.409 | 0.66108 | -9.800e+06 | 3.400e+38 |
| 7.769 | 0.66041 | -2.241e+07 | 3.400e+38 |
| 8.139 | 0.66131 | -5.266e+07 | 3.400e+38 |
| 8.589 | 0.66113 | -1.484e+08 | 3.400e+38 |
| 8.929 | 0.66100 | -3.244e+08 | 3.400e+38 |
| 9.299 | 0.66048 | -7.595e+08 | 3.400e+38 |
| 9.709 | 0.66067 | -1.953e+09 | 3.400e+38 |
| 10.13 | 0.66065 | -5.137e+09 | 3.400e+38 |
| 10.50 | 0.66107 | -1.206e+10 | 3.400e+38 |
| 10.94 | 0.66170 | -3.326e+10 | 3.400e+38 |
| 11.32 | 0.66107 | -7.966e+10 | 3.400e+38 |
| 11.70 | 0.66028 | -1.907e+11 | 3.400e+38 |
| 12.12 | 0.66030 | -5.016e+11 | 3.400e+38 |
| 12.51 | 0.66019 | -1.231e+12 | 3.400e+38 |

(b) at 345 nm

| p[H]   | absorbance | $(A_{H_3L} - A)/[H]$ | $\log\{(A_{H_3L} - A)/(A - A_{H_2L})\}$ |
|--------|------------|----------------------|-----------------------------------------|
| 0.9691 | 0.18229    | 1.161                | -0.3374                                 |
| 1.149  | 0.20085    | 1.496                | -0.1457                                 |
| 1.299  | 0.21555    | 1.821                | -0.004055                               |
| 1.479  | 0.23401    | 2.200                | 0.1744                                  |
| 1.719  | 0.25582    | 2.680                | 0.4077                                  |
| 1.879  | 0.26938    | 2.848                | 0.5842                                  |
| 2.029  | 0.28068    | 2.814                | 0.7721                                  |
| 2.159  | 0.28756    | 2.804                | 0.9225                                  |
| 2.369  | 0.29693    | 2.356                | 1.232                                   |
| 2.509  | 0.30098    | 1.944                | 1.466                                   |
| 2.709  | 0.30706    | -0.03071             | 3.400e+38                               |
| 2.869  | 0.30982    | -2.086               | 3.400e+38                               |
| 3.029  | 0.31348    | -6.929               | 3.400e+38                               |
| 3.199  | 0.31580    | -13.92               | 3.400e+38                               |
| 3.409  | 0.32170    | -37.72               | 3.400e+38                               |



**Table S-2.4** Raw data (continued)

|       |         |            |           |
|-------|---------|------------|-----------|
| 3.599 | 0.33144 | -97.11     | 3.400e+38 |
| 3.749 | 0.34298 | -201.9     | 3.400e+38 |
| 3.899 | 0.36083 | -426.7     | 3.400e+38 |
| 4.079 | 0.39503 | -1056      | 3.400e+38 |
| 4.229 | 0.42669 | -2028      | 3.400e+38 |
| 4.389 | 0.47807 | -4190      | 3.400e+38 |
| 4.519 | 0.52330 | -7147      | 3.400e+38 |
| 4.669 | 0.57307 | -1.242e+04 | 3.400e+38 |
| 4.829 | 0.61765 | -2.096e+04 | 3.400e+38 |
| 4.979 | 0.64949 | -3.264e+04 | 3.400e+38 |
| 5.129 | 0.67253 | -4.920e+04 | 3.400e+38 |
| 5.299 | 0.69041 | -7.634e+04 | 3.400e+38 |
| 5.439 | 0.70043 | -1.081e+05 | 3.400e+38 |
| 5.609 | 0.70871 | -1.633e+05 | 3.400e+38 |
| 5.789 | 0.71441 | -2.507e+05 | 3.400e+38 |
| 5.939 | 0.71758 | -3.568e+05 | 3.400e+38 |
| 6.119 | 0.72014 | -5.435e+05 | 3.400e+38 |
| 6.279 | 0.72166 | -7.884e+05 | 3.400e+38 |
| 6.459 | 0.72256 | -1.196e+06 | 3.400e+38 |
| 6.619 | 0.72352 | -1.733e+06 | 3.400e+38 |
| 6.779 | 0.72317 | -2.502e+06 | 3.400e+38 |
| 6.939 | 0.72407 | -3.625e+06 | 3.400e+38 |
| 7.169 | 0.72537 | -6.175e+06 | 3.400e+38 |
| 7.409 | 0.72521 | -1.073e+07 | 3.400e+38 |
| 7.769 | 0.72556 | -2.459e+07 | 3.400e+38 |
| 8.139 | 0.72555 | -5.765e+07 | 3.400e+38 |
| 8.589 | 0.72605 | -1.627e+08 | 3.400e+38 |
| 8.929 | 0.72554 | -3.555e+08 | 3.400e+38 |
| 9.299 | 0.72540 | -8.330e+08 | 3.400e+38 |
| 9.709 | 0.72540 | -2.141e+09 | 3.400e+38 |
| 10.13 | 0.72546 | -5.633e+09 | 3.400e+38 |
| 10.50 | 0.72553 | -1.321e+10 | 3.400e+38 |
| 10.94 | 0.72663 | -3.647e+10 | 3.400e+38 |
| 11.32 | 0.72546 | -8.724e+10 | 3.400e+38 |
| 11.70 | 0.72555 | -2.093e+11 | 3.400e+38 |
| 12.12 | 0.72605 | -5.512e+11 | 3.400e+38 |

**Table S-2.4** Raw data (continued)

| 12.51              | 0.72554    | -1.351e+12                                | 3.400e+38                                                           |
|--------------------|------------|-------------------------------------------|---------------------------------------------------------------------|
| (C) data at 350 nm |            |                                           |                                                                     |
| p[H]               | absorbance | $(A_{\text{H}_2\text{L}} - A)/[\text{H}]$ | $\log\{(A_{\text{H}_2\text{L}} - A)/(A - A_{\text{H}_2\text{L}})\}$ |
| 0.9691             | 0.17995    | 1.146                                     | -0.2564                                                             |
| 1.149              | 0.19780    | 1.483                                     | -0.08738                                                            |
| 1.299              | 0.21348    | 1.782                                     | 0.05543                                                             |
| 1.479              | 0.23203    | 2.139                                     | 0.2290                                                              |
| 1.719              | 0.25479    | 2.525                                     | 0.4723                                                              |
| 1.879              | 0.26810    | 2.642                                     | 0.6512                                                              |
| 2.029              | 0.27914    | 2.551                                     | 0.8460                                                              |
| 2.159              | 0.28611    | 2.436                                     | 1.014                                                               |
| 2.369              | 0.29130    | 2.738                                     | 1.186                                                               |
| 2.509              | 0.29558    | 2.395                                     | 1.394                                                               |
| 2.709              | 0.30029    | 1.385                                     | 1.843                                                               |
| 2.869              | 0.30341    | -0.3011                                   | 3.400e+38                                                           |
| 3.029              | 0.30648    | -3.723                                    | 3.400e+38                                                           |
| 3.199              | 0.31000    | -11.07                                    | 3.400e+38                                                           |
| 3.409              | 0.31629    | -34.08                                    | 3.400e+38                                                           |
| 3.599              | 0.32378    | -82.57                                    | 3.400e+38                                                           |
| 3.749              | 0.33356    | -171.5                                    | 3.400e+38                                                           |
| 3.899              | 0.34738    | -351.8                                    | 3.400e+38                                                           |
| 4.079              | 0.36764    | -775.6                                    | 3.400e+38                                                           |
| 4.229              | 0.39497    | -1559                                     | 3.400e+38                                                           |
| 4.389              | 0.43202    | -3160                                     | 3.400e+38                                                           |
| 4.519              | 0.46654    | -5404                                     | 3.400e+38                                                           |
| 4.669              | 0.50736    | -9538                                     | 3.400e+38                                                           |
| 4.829              | 0.54648    | -1.643e+04                                | 3.400e+38                                                           |
| 4.979              | 0.57531    | -2.595e+04                                | 3.400e+38                                                           |
| 5.129              | 0.59583    | -3.942e+04                                | 3.400e+38                                                           |
| 5.299              | 0.61080    | -6.128e+04                                | 3.400e+38                                                           |
| 5.439              | 0.61846    | -8.670e+04                                | 3.400e+38                                                           |
| 5.609              | 0.62415    | -1.306e+05                                | 3.400e+38                                                           |
| 5.789              | 0.62812    | -2.000e+05                                | 3.400e+38                                                           |
| 5.939              | 0.63012    | -2.843e+05                                | 3.400e+38                                                           |
| 6.119              | 0.63086    | -4.313e+05                                | 3.400e+38                                                           |

**Table S-2.4** Raw data (continued)

|       |         |            |           |
|-------|---------|------------|-----------|
| 6.279 | 0.63127 | -6.242e+05 | 3.400e+38 |
| 6.459 | 0.63294 | -9.495e+05 | 3.400e+38 |
| 6.619 | 0.63278 | -1.372e+06 | 3.400e+38 |
| 6.779 | 0.63281 | -1.983e+06 | 3.400e+38 |
| 6.939 | 0.63417 | -2.878e+06 | 3.400e+38 |
| 7.169 | 0.63441 | -4.892e+06 | 3.400e+38 |
| 7.409 | 0.63699 | -8.567e+06 | 3.400e+38 |
| 7.769 | 0.63614 | -1.958e+07 | 3.400e+38 |
| 8.139 | 0.63778 | -4.611e+07 | 3.400e+38 |
| 8.589 | 0.63748 | -1.299e+08 | 3.400e+38 |
| 8.929 | 0.63801 | -2.845e+08 | 3.400e+38 |
| 9.299 | 0.63744 | -6.659e+08 | 3.400e+38 |
| 9.709 | 0.63722 | -1.710e+09 | 3.400e+38 |
| 10.13 | 0.63830 | -4.513e+09 | 3.400e+38 |
| 10.50 | 0.63778 | -1.056e+10 | 3.400e+38 |
| 10.94 | 0.63748 | -2.907e+10 | 3.400e+38 |
| 11.32 | 0.63801 | -6.985e+10 | 3.400e+38 |
| 11.70 | 0.63744 | -1.673e+11 | 3.400e+38 |
| 12.12 | 0.63722 | -4.397e+11 | 3.400e+38 |
| 12.51 | 0.63830 | -1.083e+12 | 3.400e+38 |

### 3. A-, AD-, and ADQ-diagram of calix[4]arenetetrasulfonate (3)

#### 3.1 A-diagram

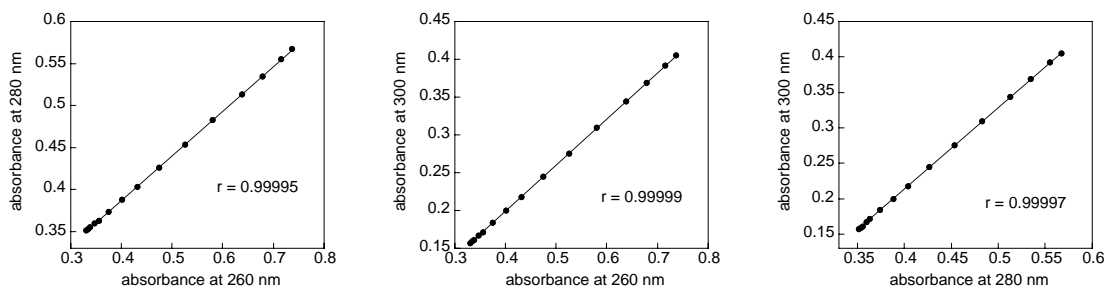

**Figure S-3.1** A-diagram for the calixarene **3** in the region of  $10.10 < \text{p[H]} < 12.88$ .

$[\text{calixarene } 3]_{\text{T}} = 44.2 \mu\text{mol dm}^{-3}$ ,  $I = 0.2 \text{ mol dm}^{-3}$ , optical path-length = 1 cm.

#### 3.2 AD-diagram

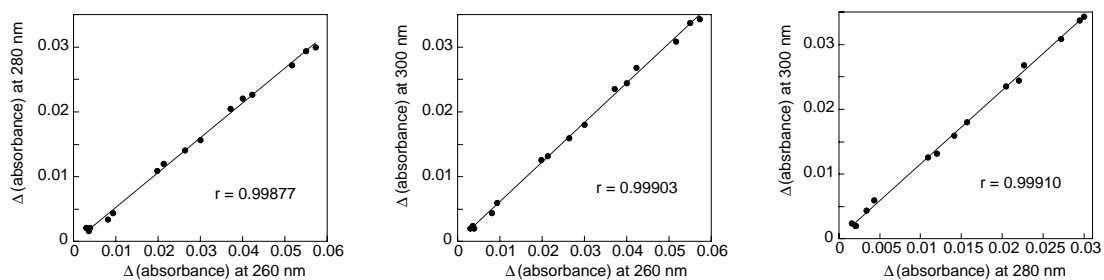

**Figure S-3.2** AD-diagram for the calixarene **3** in the region of  $10.10 < \text{p[H]} < 12.88$ .

$[\text{calixarene } 3]_{\text{T}} = 44.2 \mu\text{mol dm}^{-3}$ ,  $I = 0.2 \text{ mol dm}^{-3}$ , optical path-length = 1 cm.

#### 3.2 ADQ-diagram

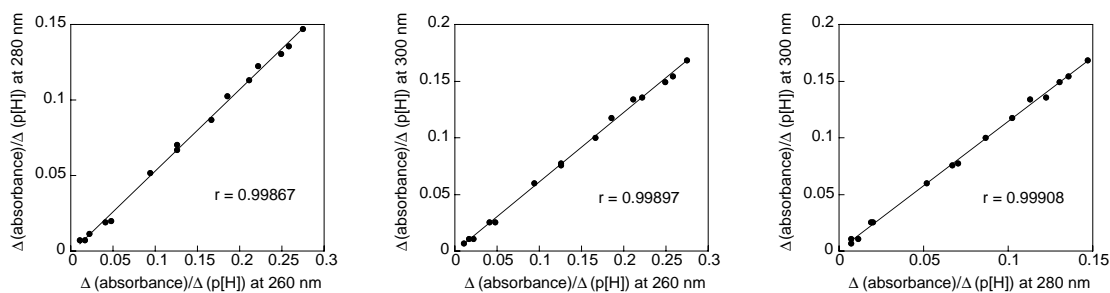

**Figure S-3.3** ADQ-diagram for the calixarene **3** in the region of  $10.10 < \text{p[H]} < 12.88$ .

$[\text{calixarene } 3]_{\text{T}} = 44.2 \mu\text{mol dm}^{-3}$ ,  $I = 0.2 \text{ mol dm}^{-3}$ , optical path-length = 1 cm.
